1

2

3

4 A comparative analysis of current phasing and imputation software

5

6 **Author's list:** Adriano De Marino<sup>1</sup>, Abdallah Amr Mahmoud<sup>1</sup>, Madhuchanda Bose<sup>1</sup>, Karatuğ  
7 Ozan Bircan<sup>1</sup>, Andrew Terpolovsky<sup>1</sup>, Varuna Bamunusinghe<sup>1</sup>, Umar Khan<sup>1</sup>, Biljana Novković<sup>1</sup>,  
8 Puya G. Yazdi<sup>1\*</sup>

9 <sup>1</sup> Research & Development, SelfDecode, Miami, FL, USA

10

11

12 \*Corresponding author

13 e-mail: [pyazdi@selfdecode.com](mailto:pyazdi@selfdecode.com) (PGY)

14

15

16

## 17 **Abstract**

18 Whole-genome data has become significantly more accessible over the last two decades. This can  
19 largely be attributed to both reduced sequencing costs and imputation models which make it  
20 possible to obtain nearly whole-genome data from less expensive genotyping methods, such as  
21 microarray chips. Although there are many different approaches to imputation, the Hidden Markov  
22 Model remains the most widely used. In this study, we compared the latest versions of the most  
23 popular Hidden Markov Model based tools for phasing and imputation: Beagle 5.2, Eagle 2.4.1,  
24 Shapeit 4, Impute 5 and Minimac 4. We benchmarked them on three input datasets with three  
25 levels of chip density. We assessed each imputation software on the basis of accuracy, speed and  
26 memory usage, and showed how the choice of imputation accuracy metric can result in different  
27 interpretations. The highest average concordance rate was achieved by Beagle 5.2, followed by  
28 Impute 5 and Minimac 4, using a reference-based approach during phasing and the highest density  
29 chip. IQS and  $R^2$  metrics revealed that IMPUTE5 obtained better results for low frequency  
30 markers, while Beagle 5.2 remained more accurate for common markers ( $MAF > 5\%$ ).  
31 Computational load as measured by run time was lower for Beagle 5.2 than Impute 5 and Minimac  
32 4, while Minimac utilized the least memory of the imputation tools we compared. ShapeIT 4, used  
33 the least memory of the phasing tools examined, even with the highest density chip. Finally, we  
34 determined the combination of phasing software, imputation software, and reference panel, best  
35 suited for different situations and analysis needs and created an automated pipeline that provides  
36 a way for users to create customized chips designed to optimize their imputation results.

37 **Keywords:** Imputation, software, accuracy, quality, 1000 Genomes, BEAGLE, EAGLE,  
38 MINIMAC, IMPUTE, SHAPEIT, genetics

## 39 **Introduction**

40 Genome wide association studies (GWAS) remain one of the most critical and powerful methods  
41 of identifying key genes and variants that play a role in many common human diseases (The  
42 Wellcome Trust Case Control Consortium 2007, Uffelmann et al. 2021). Identification of disease-  
43 associated variants in GWAS is dependent on successful tagging of millions of common variants  
44 in the human genome, and the ability to make inferences about genotypes of rare variants which  
45 are often not in linkage disequilibrium (LD) with common variants (The Wellcome Trust Case  
46 Control Consortium 2007, Uffelmann et al. 2021). Commercial single nucleotide polymorphism  
47 (SNP) genotyping arrays can contain up to 2.5 million markers, but none provide complete  
48 coverage of the human genome (Schurz et al. 2019). Despite the advances of the last two decades  
49 which have led to increasingly rapid and extensive genotyping, it is still prohibitively expensive  
50 to obtain whole genome sequencing (WGS) for the tens of thousands of individuals in GWAS  
51 (Peterson et al. 2017, Quick et al. 2020). Individual GWAS may also use distinct chips with  
52 different markers. To combine these GWAS for meta analysis, we require a method by which to  
53 identify genotypes at all markers utilized in each of these studies (Zaitlen and Eskin 2010). Thus,  
54 we continue to rely on imputation, the process of probabilistically estimating non-genotyped  
55 alleles for individuals in GWAS samples.

56 **Genotype imputation** is a method that infers the alleles of un-genotyped single-nucleotide  
57 polymorphisms (SNPs) based on the linkage disequilibrium (LD) with directly genotyped markers  
58 using a suitable reference population (Marchini and Howie 2010). It is predicated on the idea that  
59 seemingly unrelated individuals from the human population sampled at random can share short  
60 stretches of DNA within chromosomes derived from a shared ancestor (Scheet and Stephens

61 2006). Imputation can be used to improve SNP coverage and increase the statistical power of  
62 GWAS (Pei et al. 2010; Malhotra et al. 2014). Genotype imputation also facilitates fine mapping  
63 of causal variants, plays a key role in the meta-analyses of GWAS, and can be utilized in  
64 downstream applications of GWAS such as estimation of disease risk (Das, Abecasis, and  
65 Browning 2018). However, an important limitation of imputation is that only variants that were  
66 previously observed in a reference panel can be imputed (Das, Abecasis, and Browning 2018).  
67 Furthermore, rare variants are often poorly represented in reference panels making accurate  
68 imputation of rare and infrequent variants difficult. In addition, the choice of whether to pre-phase  
69 the data can impact imputation. Finally, imputation accuracy, sensitivity and computational  
70 efficiency are greatly affected by the choice of imputation software or tool (Das, Abecasis, and  
71 Browning 2018).

72 Over the last twenty years, multiple research groups have developed and published a number of  
73 phasing and imputation models, the majority of which are based on the Li and Stephens Hidden  
74 Markov Model (HMM) (Li and Stephens 2003). First described in 2003, it was applied to  
75 haplotype estimation methods, termed "**phasing**", and used to handle large stretches of  
76 chromosome where individual haplotypes share contiguous, mosaic stretches with other  
77 haplotypes in the sample (Scheet and Stephens 2006, Das, Abecasis, and Browning 2018). Unlike  
78 previous coalescent approaches, it was computationally tractable, and methods based on the Li &  
79 Stephens HMM were soon shown to be more accurate and efficient than other methods (Lunter  
80 2019, Scheet and Stephens 2006). Landmark and popular phasing algorithms are listed in Table 1,  
81 as a brief tabular history of the field. Currently, the most commonly used Li and Stephens HMM-  
82 based software's are **BEAGLE**, **EAGLE**, and **SHAPEIT** for phasing, and **BEAGLE**, **IMPUTE**  
83 and **MINIMAC** for imputation.

84

85 **Table 1. A brief history of phasing and imputation tools.**

|                      | Software                                                         | Published | Based on                 | Features                                                                                                                  | Complexity         |
|----------------------|------------------------------------------------------------------|-----------|--------------------------|---------------------------------------------------------------------------------------------------------------------------|--------------------|
| Phasing              | <a href="#">PHASE v 1.0 (Stephens, Smith, and Donnelly 2001)</a> | 2001      | Coalescent approximation |                                                                                                                           | quadratic $O(n^2)$ |
|                      | HAPI-UR (Williams et al. 2012)                                   | 2012      | Li & Stephens HMM        | used windows of sites instead of specific markers; led to higher accuracy                                                 |                    |
|                      | Eagle 2 (Loh et al. 2016)                                        | 2016      | Li & Stephens HMM        | pBWT on a large reference panel condensed into a set of compact tree structures that losslessly model haplotype structure | linear $O(nm)$     |
| Phasing & Imputation | fastPHASE (Scheet and Stephens 2006)                             | 2006      | Li & Stephens HMM        |                                                                                                                           | linear $O(n)$      |
|                      | Beagle v. 1.0 (Browning & Browning 2007)                         | 2007      | Li & Stephens HMM        | uses bifurcating tree structure (aka haplotype-cluster model)                                                             | linear $O(n)$      |
|                      | Beagle v. 2.0, 3.0 (Browning & Browning 2009, 2013)              | 2009      | Li & Stephens HMM        | uses bifurcating tree structure (aka haplotype-cluster model)                                                             | linear $O(n)$      |
|                      | Beagle v. 4.0 (Browning & Browning 2018)                         | 2018      | Li & Stephens HMM        | abandoned bifurcating model to adopt a flexible choice of haplotypes for reference similar to IMPUTE 2                    | linear $O(n)$      |
|                      | Beagle v. 5.2 (Browning & Browning 2021)                         | 2021      | Li & Stephens HMM        | Introduction of progressive phasing algorithm to handle hundreds of millions of markers                                   |                    |
|                      | IMPUTE 2 (Howie, Donnelly and Marchini 2009)                     | 2009      | Li & Stephens HMM        | flexible choice of haplotypes for reference panel; quadratic computational complexity meant inefficient                   | quadratic $O(n^2)$ |
|                      | IMPUTE 4 (Bycroft et al. 2018)                                   | 2018      | Li & Stephens HMM        | speed up haplotype imputation step                                                                                        | quadratic $O(n^2)$ |

|            |                                                   |      |                   |                                                                                     |                    |
|------------|---------------------------------------------------|------|-------------------|-------------------------------------------------------------------------------------|--------------------|
|            | IMPUTE 5 (Rubinacci, Delaneau and Marchini 2020)  | 2019 | Li & Stephens HMM | uses positional BWT to choose haplotypes for each window                            | linear $O(nm)$     |
|            | MACH (Li et al. 2010)                             | 2010 | Li & Stephens HMM | An iteratively updated phase of each study sample                                   | quadratic $O(n^2)$ |
|            | SHAPEIT 1 (Delaneau, Marchini and Zagury 2012)    | 2011 | Li & Stephens HMM | flexible choice of the panel but computationally efficient                          | linear $O(n)$      |
|            | SHAPEIT 2 (Delaneau and Marchini 2014)            | 2013 | Li & Stephens HMM | combined best aspects of SHAPEIT 1 and IMPUTE 2 to increase accuracy and efficiency | linear $O(n)$      |
|            | SHAPEIT 3 (Marchini et al. 2016)                  | 2016 | Li & Stephens HMM | increased scalability from SHAPEIT 2                                                | linear $O(n)$      |
|            | SHAPEIT 4 (Delaneau et al. 2019)                  | 2018 | Li & Stephens HMM | pBWT to choose haplotypes for local window                                          | linear $O(nm)$     |
| Imputation | Minimac (Howie et al 2012)                        | 2012 | Li & Stephens HMM | pre-phased imputation                                                               | linear $O(nm)$     |
|            | Minimac 2 (Fuchsberger, Abecasis, and Hinds 2015) | 2014 | Li & Stephens HMM |                                                                                     | linear $O(nm)$     |
|            | Minimac 3 (Das et al. 2016)                       | 2015 | Li & Stephens HMM | state-space reduction to reduce computational complexity and cost                   | linear $O(nm)$     |
|            | Minimac4 (Júnior et al. 2021)                     | 2018 | Li & Stephens HMM |                                                                                     | linear $O(nm)$     |

86 A timeline and brief description of landmark and popular phasing and imputation algorithms and  
 87 their computational complexities

88

89 Imputation accuracy is measured by several key sets of metrics which can be classified into two  
 90 overarching types: statistics that compare imputed genotypes to ‘gold standard’ genotyped data  
 91 and statistics produced without reference to true genotypes ([Ramnarine et al. 2015](#)). Concordance  
 92 rate, squared correlation  $R^2$ , and Imputation Quality Score (IQS) are examples of the first type  
 93 ([Candelaria Vergara 2018](#), [Ramnarine et al. 2015](#)). In practice, the purpose of imputation is to  
 94 predict SNPs for which we do not have genotyped data; statistics of the second type are typically

95 relied upon during imputation, and generally output by the various imputation programs. Although  
96 the rapid increase in the number of deeply sequenced individuals will soon make it possible to  
97 assemble increasingly large reference panels that greatly increase the number of imputable  
98 variants, the choice of phasing and imputation software currently has a significant impact on  
99 accuracy ([Herzig et al. 2018](#)). While several studies have evaluated and compared imputation  
100 models, or phasing models, or imputation models in combination with different reference panels,  
101 no recent studies have compared imputation and phasing algorithms in combination with different  
102 reference panels, in tandem, and evaluated the relative computational efficiency and accuracy of  
103 each combination ([Sariya et al. 2019](#), [Herzig et al. 2018](#)).

104 In this study, we evaluate the latest versions of the most commonly used tools for phasing and  
105 imputation in terms of accuracy, computational speed and memory usage, using 2 different  
106 versions of the 1kG project as reference panels and three different microarray chip datasets as  
107 inputs. We combine each tool for phasing with a method for imputation to understand which  
108 combination achieves the best overall results and which method is the best at imputing rare  
109 variants. Our goal was to determine the combination of phasing and imputation software and  
110 reference panel that is best suited for different situations and needs.

## 111 **Methods**

### 112 **Chip Data**

113 We used three different chip datasets with differing marker density and input dataset sizes. The  
114 first chip dataset (**Affymetrix**) was composed of 3450 unrelated individuals from The 1000  
115 Genomes Project genotyped with the Affymetrix 6.0 900K array (Affymetrix, ThermoFisher), the

116 second (**Omni**) of 2318 unrelated individuals from the 1000 Genomes Project genotyped with the  
117 Omni 2.5 chip by Illumina 2.4 Million unphased SNP markers, and the third one (**Customized**)  
118 was a subset of the first two chips and consisted of the intersection of the first two chips with  
119 another chip, GSA version 3 with direct-to-consumer booster by Illumina (Fig. 1). This  
120 Customized chip is the intersection of commonly used chips, resulting in a low-density chip with  
121 fewer overall sites, to allow us to assess imputation and phasing accuracy when the input data is  
122 limited to a relatively small number of SNPs.

123

124 **Fig. 1. Chip data used to assess imputation and phasing accuracy and origin of the**  
125 **customized chip.** Affymetrix, Omni and Customized chips. SNP numbers for chromosome 20  
126 are shown. Customized chip data was obtained from the intersection of the first two chips with  
127 the Eurofins chip.

128

129 Fig. 2 describes the preparation of chip datasets for analysis. Data from Affymetrix and Omni  
130 chips were normalized using BCFtools ([Petr Danecek 2021](#)). Chip data was processed separately  
131 for each chromosome, which was renamed numerically with the 'chr' tag to match the reference  
132 panel. Chromosome 20 was chosen for use in all downstream analyses as it is generally  
133 representative of autosomal chromosomes. Sample data was converted to GRCh38 with Picard  
134 liftover ([Picard Toolkit 2019](#)), to match the assembly of the reference panels. We split multiallelic  
135 sites to record them as biallelic, left-normalized the variants to the reference genome, and removed  
136 duplicate variants. Finally, because Beagle does not allow skipping imputation of sporadic missing  
137 data, variants with missing genotype information were removed from the chip datasets and the  
138 WGS reference panels.



139

140 **Fig. 2. Pre-processing of the HD genotype chips and reference panels.** Pre-processing of the  
141 HD genotype chips and reference panels downloaded from the International Genome Sample  
142 Resource (IGSR). Steps highlighted in orange are specific to the 1000GPphase3 reference panel  
143 only; all other steps were performed for both reference panels.

144

## 145 **Reference Panel Collection and Sample Selection**

146 We drew our reference panels for imputation and phasing from the The 1000 Genomes Project  
147 (1000GP). We used the Phase 3 low coverage WGS which has a mean depth of 7X as one  
148 reference panel and the high coverage WGS, with a mean depth of 30x, as a second reference panel  
149 ([1000 Genomes Project Consortium et al. 2010, 467; 2010, 491; 2015, 526; Sudmant et al. 2015](#)).  
150 We refer to these as the 1000GP-Phase3 and 1000GP-30x reference panels.

151 We randomly selected 190 unrelated individuals taken from the set of 1686 individuals found in  
152 all three collections -- the Omni, Affymetrix and WGS 1000 Genomes Project sample collections  
153 ([Sudmant et al. 2015](#)) as shown in Fig 3. Our sample consisted of 5 males and 5 females per  
154 population, for 19 different populations and 5 super-populations (Fig 4.). These 190 individuals,  
155 and their relatives, were removed from the reference panels and used to create chip datasets for  
156 testing. Imputation accuracy was assessed by looking at the concordance between the imputed  
157 chips' data and the whole genome sequences for these 190 samples.

158

159

160 **Fig. 3 - Shared individuals between HD genotype chips and reference panels.**

161 Individuals in common between the WGS Reference panels, Omni and Affymetrix chips.

162

163 **Fig. 4 - Origin of the target samples**

164 Sample of 190 individuals belonging to 19 populations from 5 super populations selected for this  
165 study.

166

167 **Quality Control of Reference Panels**

168 For both reference panels, we used BCFtools ([Petr Danecek 2021](#)) to split multiallelic sites,  
169 remove duplicates and missing data, and align variants to the reference genome. Both the  
170 1000GP30x and 1000GPphase3 panels were preprocessed by prepending the contig name with the  
171 prefix 'chr'. Two additional steps were performed for the 1000GPphase3 panel to convert it to  
172 GRCh38 with Picard liftover ([Picard Toolkit 2019](#)), and discard rare variant singletons and  
173 doubletons to evaluate if their removal increased imputation accuracy for common variants  
174 (MAF>5%). The workflow for the quality control and pre-processing of the reference panels is  
175 shown in Fig. 2.

176

177 **Phasing and Imputation Pipeline**

178 The **Affymetrix**, **Omni** and **Customized** chips were used as inputs for 9 combinations of phasing  
179 and imputation tools to assess which combination performed best for our sample set (Fig. 5), using

180 one of the two reference panels. Phasing was performed using both **reference-free** and **reference-**  
181 **based** approaches for each method, to compare their respective resultant imputation accuracy. This  
182 yielded a total of 108 combinations of input chip dataset, phasing tool, reference-based or  
183 reference-free phasing, imputation reference panel, and imputation tool (Supplementary Table 1).

184 The haplotype phasing softwares we compared are: **Eagle2 v2.4.1** ([Loh et al. 2016](#)), **Beagle5 v5.2**  
185 ([Browning, Zhou, and Browning 2018](#)), and **Shapeit4 v4.2.1** ([Delaneau et al. 2019](#)). All phasing  
186 software was launched with default parameters using 4 cores for each analysis on an Intel  
187 Corporation 82371AB/EB/MB PIIIX4 ACPI 64-bit 32Gb RAM and the saved log file was used to  
188 evaluate the total run time. The imputation methods we tested are: **Beagle5 v5.2** ([Browning, Zhou,](#)  
189 [and Browning 2018](#)), **Impute5 v1.1.5** ([Rubinacci, Delaneau, and Marchini 2020](#)) and **Minimac4**  
190 **v1.0.0** ([Das et al. 2016](#)).

191

### 192 **Fig. 5 - Workflow of the analysis, combinations tested.**

193 Each input chip dataset was analysed using the 36 combinations of 3 different phasing softwares,  
194 2 phasing approaches, 3 imputation softwares, and 2 imputation reference panels.

195

196 Each input chip dataset was processed using **selphi.sh** (SELfdecode PHasing and Imputation) an  
197 automated pipeline built in bash that combines the phasing and imputation software and evaluates  
198 accuracy at each step to speed up the process of analysis and comparison. The inputs to the pipeline  
199 are the chip data file, a reference panel, the number of threads to use and the chromosome to  
200 process. The pipeline first checks that the correct version of the reference panel already exists for  
201 each imputation software to use and if the input file is available both in BCF format and in VCF

202 format. This means that the original reference panel is converted to **bref3** for Imputation with  
203 Beagle5.2 using bref3.29May21.d6d.jar, to **m3mv** for Minimac4 using Minimac3 and to **imp5** for  
204 Impute5 using imp5Converter\_1.1.5\_static. If any of these files don't exist, they are automatically  
205 created by the pipeline. After this initial check, the pipeline begins phasing the haplotypes using  
206 Eagle2.4.1, Beagle5.2 and Shapit4. Each of these softwares was run twice with default parameters,  
207 once with the reference and once without, using 4 threads on chromosome 20 with recombination  
208 rates drawn from the genetic map. This step generated 2 phased VCF files for each software,  
209 yielding a total of 6 phased VCF files. After phasing, VCF files were moved to imputation with  
210 Beagle5.2, Minimac4 and Impute5. All were run using default parameters with a genetic map for  
211 the recombination rate and 4 threads. There are options to speed up both Minimac4 and Impute5  
212 but these tend to reduce the accuracy rate. To maximize the accuracy of each tool and preserve the  
213 validity of the comparison, we ran them with the default parameters, avoiding the steps required  
214 to optimize for computational load.

## 215 **Accuracy Measurement**

216 Accuracy was assessed by comparing the imputation data resulting from each of the different  
217 combinations of phasing tool, imputation tool, and choice of reference, against the WGS dataset  
218 of the chosen 190 target samples. Variables considered were population/ancestry, sex, choice of  
219 tools, choice of reference, use of a reference panel, chip density, and the effect of MAF. We also  
220 looked at computational efficiency and memory usage. To check the effects of MAF on imputation  
221 accuracy, we used  $r^2$  as the metric of choice as it can distinguish between different MAF  
222 stratifications and is the most widely used metric for assessing imputation accuracy ([Liu et al.](#)  
223 [2013](#)).

224 Accuracy was evaluated using a custom, faster version of the imputation accuracy calculation  
225 software available on [github](#) ([Chen et al. 2020](#)) that summarizes the accuracy metrics described in  
226 the work of Ramnarine et al. 2015 ([Ramnarine et al. 2015](#)). A detailed report with the concordance  
227 ratio (Po), F-measure score, square correlation ( $R^2$ ) and imputation quality score (IQS) was  
228 generated and written to the output file. To accurately assess IQS and  $R^2$  results, we removed all  
229 variants with MAF equal to 0 in our target population (allele count equal to 0) of 190 individuals  
230 from the analysis; IQS is zero when MAF is equal to zero, and is not indicative of accuracy or  
231 imputation quality. The entire code for accuracy metrics can be found in the script `simpy.py` (see  
232 section Data Available).

## 233 **Results**

### 234 **Genotyping Data**

235 After performing quality control on chromosome 20, 18,279 variants with a genotyping call rate  
236 of 100% remained in the Affymetrix chip dataset, and 37,334 variants with a genotyping call rate  
237 of 100% remained in the Omni Illumina dataset. In total, 5065 SNP markers overlapped between  
238 the two chips. The customized chip had 5913 markers shared between the Eurofins and the  
239 Affymetrix and Omni chips. The number of variants shared between the chip datasets and the  
240 1000GP-30x panel (WGS) is shown in Fig. 6.

241

#### 242 **Fig. 6 - Number of shared variants between datasets.**

243 Variants on chromosome 20 shared between chips and the 1000GP-30x WGS reference panel.

244

## 245 **Imputation Accuracy**

### 246 **Minor Allele Frequency (MAF) And Reference Panel**

247 We stratified variants based on MAF and assessed imputation accuracy for common, infrequent,  
 248 and rare variants to obtain a more nuanced understanding of how well each combination of  
 249 phasing-imputation tools performed (Table 2).

250 **Table 2. MAF-stratified comparison of phasing-imputation combinations.**

| MAF     | Combination          | Sensitivity % | FPR % |
|---------|----------------------|---------------|-------|
| MAF <5% | Beagle5.2-Beagle5.2  | 99.553        | 0.095 |
|         | Beagle5.2-Impute5    | 99.603        | 0.172 |
|         | Beagle5.2-Minimac4   | 99.527        | 0.095 |
|         | Eagle2.4.1-Beagle5.2 | 99.535        | 0.097 |
|         | Eagle2.4.1-Impute5   | 99.586        | 0.177 |
|         | Eagle2.4.1-Minimac4  | 99.509        | 0.097 |
|         | ShapIT4-Beagle5.2    | 99.561        | 0.098 |
|         | ShapIT4-Impute5      | 99.611        | 0.174 |
|         | ShapIT4-Minimac4     | 99.536        | 0.099 |
| MAF >5% | Beagle5.2-Beagle5.2  | 98.719        | 1.958 |
|         | Beagle5.2-Impute5    | 98.706        | 2.149 |
|         | Beagle5.2-Minimac4   | 98.389        | 2.146 |
|         | Eagle2.4.1-Beagle5.2 | 98.657        | 2.046 |
|         | Eagle2.4.1-Impute5   | 98.641        | 2.257 |
|         | Eagle2.4.1-Minimac4  | 98.322        | 2.252 |
|         | ShapIT4-Beagle5.2    | 98.733        | 1.929 |

|                          |        |       |
|--------------------------|--------|-------|
| <b>ShapeIT4-Impute5</b>  | 98.716 | 2.123 |
| <b>ShapeIT4-Minimac4</b> | 98.4   | 2.118 |

251

252 A comparison of the sensitivity and false positive rate (FPR) of the imputation results, for each  
253 phasing-imputation combination, as stratified by MAF.

254

255 Based on the accuracy metric, the False Positive Rate (FPR), and the sensitivity, Beagle5.2  
256 outperformed other phasing tools when MAF was greater than 5%, with ShapeIT4 a close second.  
257 However, for uncommon variants ( $MAF \leq 5\%$ ), ShapeIT4 was the better phasing tool, irrespective  
258 of imputation tool choice. For the imputation of uncommon variants ( $MAF \leq 5\%$ ), Impute5  
259 outperformed Beagle5.2 and Minimac, for each phasing tool combination. However, for common  
260 variants ( $MAF \geq 5\%$ ), Beagle5.2 was superior. Similar results were obtained using  $r^2$  as the metric  
261 (Fig. 7). The best combination overall was ShapeIT4-Beagle5.2 imputing from the Omni chip  
262 dataset, with a reference-based phasing approach and imputing using the 1000GP-Phase3  
263 reference panel, resulting in an average imputation  $r^2$  of 0.839 (S1 Table 1). On the other hand, for  
264 the 1000GP-30x reference panel, the best phasing and imputation tool combination  
265 was ShapeIT4-Impute5 using an Omni chip with reference-based phasing, resulting in an average  
266 imputation  $r^2$  of 0.728 (S1 Table 1).

267

268

269 **Fig. 7 - Imputation performance for chromosome 20 using 190 mixed population**  
270 **individuals with 2 reference panels and 2 phasing approaches.**

271 Blue colors indicate Beagle5.2, violets indicate Impute5 and oranges indicate Minimac4. The  
272 different input chip datasets are notated using the shape of the line: dashed for Affymetrix,  
273 continuous for Omni and dotted for the customized chip. (A) reference-based - 1000GP-30x, (B)  
274 reference-free - 1000GP-30x, (C) reference-based - 1000GP-Phase3, (D) reference-free -  
275 1000GP-Phase3.

276

277 Fig. 8 depicts an increase in IQS with increasing MAF. Impute5 produced better results at lower  
278 MAF than either Beagle5.2 or Minimac4, while Beagle5.2 imputed better above 5% allele  
279 frequency. Ultra-rare variants were imputed badly with all available software.

280

### 281 **Fig. 8 - Evaluation of rare variants imputation.**

282 Violin plot. IQS is plotted against Minor allele frequency (MAF).

283 Choosing ShapeIT4 as the phasing tool for reference-based phasing, followed by any choice of  
284 imputation tool, resulted in the highest  $r^2$  for either imputation reference panel (S1 Table 1). For  
285 the Affymetrix and customized chips, ShapeIT4 remained the best choice of phasing tool for  
286 reference-free phasing, with respect to  $r^2$ ; for Omni, Beagle was the superior phasing tool.  
287 However, when we instead considered IQS as the metric of choice, both Beagle and ShapeIT4  
288 performed equally well for reference-based phasing for higher density input chip datasets, but  
289 ShapeIT4 outperformed Beagle for the customized chip dataset, which had low chip density. For  
290 reference-free phasing, with respect to IQS, there was no clear winner between ShapeIT4 and  
291 Beagle (S1 Table 1).



292 To get a better overall representation of how MAF affects imputation accuracy and error rates, we  
293 plotted IQS against Error rate (Fig. 9), where each dot represents an imputed variant. The markers  
294 cluster according to their MAF and follow a waterfall trend. The results of this analysis are shown  
295 in Figure 9, which illustrates that IQS is generally higher and error rates overall lower for more  
296 common variants. Rare variants, with  $MAF < 1\%$ , tend to have lower IQS and higher error rates.

297

### 298 **Fig. 9 - Minor allele frequency (MAF) Stratification of imputed variants**

299 Dots are clustered following minor allele frequency stratification. The dots clustered in the right-  
300 down corner of the figure have low IQS and high Error rate, while dots in the left-high corner  
301 have high IQS and low Error rate. Each dot represents the average IQS and error rate for a  
302 specific marker imputed with one phasing tool-imputation tool combination.

303

### 304 **Population, Sex, Chip Density, and Phasing Approach**

305 Accuracy as measured by concordance ( $P_o$ ) was lowest in individuals of African ancestry, and  
306 highest in individuals of European and American populations--groups which both have significant  
307 recent European ancestry (Table 3). Furthermore, despite reaching similar average imputation  
308 accuracy, a greater proportion of EUR individuals had very high imputation accuracy compared  
309 with a progressively smaller proportion of target individuals with higher concordance for East  
310 Asian, American, African and South Asian ancestry, respectively (Fig. 10B). Thus, although we  
311 were able to reach similar mean imputation concordance for each of the different populations,  
312 imputation tools performed the best when applied to EUR populations and the worst for AFR and  
313 South Asian populations.

314 **Table 3. Accuracy for different Superpopulations.**

| <b>Superpopulation name</b> | <b>Mean</b> | <b>Std</b> |
|-----------------------------|-------------|------------|
| <b>African</b>              | 0.984396    | 0.012613   |
| <b>American</b>             | 0.993112    | 0.005104   |
| <b>East Asian</b>           | 0.991575    | 0.004868   |
| <b>European</b>             | 0.99274     | 0.004655   |
| <b>South Asian</b>          | 0.991464    | 0.004989   |

315 Accuracy as measured by concordance ( $P_o$ ) of the imputation results for each of the five main  
316 superpopulations

317

318 Differences in imputation accuracy by population and phasing approach are shown in Figure  
319 10. The reference-based approach produced better results than the reference-free approach, for  
320 most combinations of imputation and phasing algorithms, based on a comparison of IQS across all  
321 combinations (Fig. 10D). There was also a clear relationship between chip density and imputation  
322 accuracy, as measured by concordance; as chip density increased, imputation accuracy improved.  
323 Omni chip had the greatest chip density and accuracy and the customized chip the lowest (Figs.  
324 10C, 11). From the shape of the chip distributions, we see that the vast majority of the Omni dataset  
325 was imputed with very high concordance, whereas less of the Affymetrix input dataset and much  
326 less of the Customized chip dataset was imputed with similar accuracy. We also compared  
327 imputation accuracy by sex as a check to ensure our QC process does not introduce any artificial  
328 differences. Sex had no effect on imputation accuracy for autosomal chromosome 20 (Fig. 10A).  
329 Accuracy for females was on average  $0.9907 \pm 0.0078$  while for males it was  $0.9906 \pm 0.0080$ .

330

331 **Fig. 10 - Imputation concordance rate over four different features.**

332 Stacked density plot of accuracy stratified by (A) sex; (B) superpopulation; (C) chip data; (D)  
333 phasing type (reference-free and reference-based).

334

335 **Fig. 11 - Clustermap of target population against 54 software-reference panel-dataset**  
336 **combinations.**

337 This figure depicts the concordance results for the reference-free and reference-based phasing  
338 approaches for each of these combinations. Higher density chips with a reference-based phasing  
339 approach and with populations without African ancestry obtained better results in terms of  
340 imputation accuracy measured by IQS.

341

342

343 **Speed and Memory usage**

344 Of the imputation software's, Minimac4 appeared to be the most computationally efficient in terms  
345 of memory but had the slowest run time, followed by Beagle5.2 and Impute5 (Fig. 12B). Memory  
346 usage for Impute5 increased drastically with the size of the input dataset used, while Beagle and  
347 Minimac4 were not significantly affected (Fig. 12D). Beagle5.2 had the shortest run time, followed  
348 by Impute5 and Minimac4 (Fig. 12A). During phasing, Eagle2.4.1 and ShapeIT4 used less  
349 memory than Beagle5.2 and were less affected by the input size of the chip (Fig. 12C). Averaged  
350 across the datasets, Eagle2.4.1 was the slowest phasing software while ShapeIT4 was the fastest.  
351 Figure 13 shows the average computational run time for each combination. Phasing with ShapeIT4

352 and imputing with Beagle5.2 was the fastest combination, while phasing with Eagle2.4.1 and  
353 imputing with Minimac4 was the slowest.

354

355 **Fig. 12 - CPU run time and memory usage of imputation and phasing softwares.**

356 Average run time for phasing (A) and imputation (C) tools. Average memory usage for phasing  
357 (B) and imputation (D) tools.

358

359 **Fig. 13 - CPU run time of imputation and phasing combinations tested.**

360 Average run time for each of the 9 phasing and imputation software combinations.

361

## 362 Discussion

363 We performed a rigorous comparison of the most popular phasing and imputation tools currently  
364 used by genomics research groups to examine how the process of genotype imputation is affected  
365 by different factors, including the choice of reference panel, population, chip density, and allele  
366 frequency, with the factor of sex as a control on our process. We also compared the computational  
367 load of these different tools and software combinations.

## 368 Factors Affecting Imputation Accuracy

369 Imputation accuracy decreased with chip density; the Affymetrix chip resulted in lower accuracy  
370 than the Omni chip and the customized chip had the lowest imputation accuracy. While this was  
371 expected, it also shows how our processing and comparison pipeline may help researchers design

372 better chips by choosing the number and distribution of SNPs for each specific population, and  
373 assessing the impact of density and SNP choice on phasing and imputation accuracy; it can also  
374 be used to determine whether different sets of chips are likely to perform better with certain  
375 combinations of phasing and imputation tools.

376 Next, we assessed both reference-free and reference-based phasing. Although reference-free  
377 phasing was less accurate, we found that increasing chip density alleviates the degree of effect that  
378 the lack of reference has on phasing. The difference between reference-free and reference-based  
379 phasing was not extreme, suggesting that reference-free phasing may be acceptable in the absence  
380 of a representative reference panel. Previous studies comparing phasing accuracy with and without  
381 the use of a reference panel have shown that reference-free phasing, such as with Eagle2, can even  
382 lead to higher accuracy in cases where the reference panel ancestry and populations do not match  
383 well with that of the sample individuals ([Loh et al. 2016](#)).

384 Furthermore, the choice of the reference panel affects imputation accuracy, across all imputation  
385 metrics utilized. We note that using the 30X reference panel results in slightly lower imputation  
386 accuracy for uncommon variants; this was due to the panel containing more rare SNPs. As variants  
387 with lower MAF are more difficult to impute, and are imputed with greater uncertainty and reduced  
388 accuracy, these results are expected.

389 Accuracy was further affected by population but not by sex. Different populations are  
390 characterized by differences in LD as a result of differences in genealogical history, and thus have  
391 different characteristic LD blocks and LD block sizes, which affect imputation accuracy ([David  
392 M. Evans 2005](#)). We expect that lower imputation accuracy seen in individuals of AFR ancestry

393 is attributable to the smaller LD blocks characteristic of AFR ancestry, which make it more  
394 difficult to correctly impute genotypes.

395 In agreement with previous research ([Shi et al. 2018](#)), we found that variants with low allele  
396 frequency are generally imputed poorly. In general, imputation works poorly for variants with low  
397 MAF as a function of both bias in the reference panels and bias in the software ([Shi et al. 2018](#)).  
398 We can address reference-associated bias by significantly increasing the size of the chosen  
399 reference panel and including sufficient population-specific samples in the reference. However,  
400 addressing software bias would require developing improved imputation algorithms.

401 Finally, the choice of statistics is important when examining the imputation accuracy of rare and  
402 low frequency variants. We found that IQS and squared correlation produced similar means and  
403 standard deviations, though this does not necessarily represent similarity of values for particular  
404 SNPs. For rare and low frequency variants, concordance rates produce inflated assessments of  
405 accuracy ([Lin et al. 2010](#)). The higher concordance rate values could mislead a researcher into  
406 assuming that these variants were imputed well. However, accuracy for less common variants is  
407 best measured using IQS and  $R^2$  ([Ramnarine et al. 2015](#)).

## 408 Choice of Phasing and Imputation Tools

409 There was a discrepancy in accuracy based on different metrics. Highest average concordance rate  
410 was achieved by Beagle5.2 at 0.986, followed by Impute5 and Minimac4, using a reference-based  
411 approach during phasing, with the highest density chip dataset as input. In general, choosing  
412 Beagle5.2 for imputation and ShapeIT4 for phasing tends to get highly accurate results and is  
413 computationally faster. When looking to improve the imputation of rare variants, however,  
414 researchers may want to use a mix of Beagle5.2 and Impute5 by applying Beagle5.2 to common

415 variants and Impute5 to rare ones. Impute5 tends to perform better on rare variants, because unlike  
416 Beagle5.2, which computes clusters of haplotypes and does its calculations based on them,  
417 Impute5 searches the whole space of haplotypes. This is more effective when imputing uncommon  
418 variants, but there is a tradeoff of increased computational load.

419 On the other hand, we see imputation accuracy for Beagle5.2 is better than Impute5 for the filtered  
420 phase3 reference panel; this is also expected since the phase 3 panel has fewer rare alleles.  
421 Beagle5.2 was also the most stable tool to use across different input sizes. Minimac4 requires the  
422 least amount of memory but takes the longest time, which can be a good tradeoff depending on the  
423 purpose of the imputation. If the memory usage is limited, and the loss of accuracy is acceptable,  
424 then Minimac4 may be the optimal choice of imputation software. It is also important to note that  
425 the default parameters have been used for all software. For example, we could reduce the  
426 computational load of Impute5 by using parallel processing but this can negatively affect the  
427 accuracy results; this negative impact is sufficient to reduce Impute5's accuracy to below that of  
428 Beagle5.2. In conclusion, Beagle might have the best tradeoff between imputation quality and  
429 computational efficiency.

430 In conclusion, differences in imputation and phasing performance may be useful in determining  
431 the choice of imputation and phasing tool, depending on the intended downstream usage of the  
432 imputed results. However, this study also highlights that current tools are not accurate enough to  
433 impute rare and ultra-rare variants, showing that, when corrected for chance concordance and MAF  
434 bias, they result in only acceptable imputation accuracy and that there is significant scope for  
435 improvement.

436

## 437 **References**

438 The Wellcome Trust Case Control Consortium. 'Genome-Wide Association Study of 14,000  
439 Cases of Seven Common Diseases and 3,000 Shared Controls'. *Nature*. 2007; 447 (7145):  
440 661–78. doi: 10.1038/nature05911.

441

442 Uffelmann E, Huang QQ, Munung NS, de Vries J, Okada Y, Martin AR et al. Genome-wide  
443 association studies. *Nature Reviews Methods Primers*. 2021 August 26; doi: 10.1038/s43586-  
444 021-00056-9

445

446 Schurz H, Muller SJ, van Helden PD, Tromp G, Hoal EG, Kinnear CJ et al. Evaluating the  
447 accuracy of imputation methods in a five-way admixed population. *Front. Genet*. 2019 February  
448 05. doi: 10.3389/fgene.2019.00034

449

450 Peterson BS, Fredrich B, Hoepfner MP, Ellinghaus D, and A Franke. Opportunities and  
451 Challenges of whole-genome and -exome sequencing. *BMC Genet*. 2017 Feb 14; doi:  
452 10.1186/s12863-017-0479-5

453

454 Quick C, Annugu P, Musani S, Weiss ST, Burhard EG, White MJ et al. Sequencing and  
455 imputation in GWAS: Cost-effective strategies to increase power and genomic coverage across  
456 diverse populations. *Genetic Epidemiology*. 2020 June 09; 44(6):537-549

457



458 Zaitlen N and E Eskin. Imputation aware meta-analysis of genome-wide association studies.  
459 *Genet Epidemiol.* 2011 Sep 1; 34(6): 537-542  
460  
461 Marchini J and B Howie. Genotype Imputation for Genome-Wide Association Studies. *Nature*  
462 *Reviews Genetics.* 2010; 11 (7): 499–511. doi: 10.1038/nrg2796.  
463  
464 Scheet P and M Stephens. A Fast and Flexible Statistical Model for Large-Scale Population  
465 Genotype Data: Applications to Inferring Missing Genotypes and Haplotypic Phase. *The*  
466 *American Journal of Human Genetics.* 2006; 78 (4): 629–44. doi: 10.1086/502802.  
467  
468 Pei YF, Lei Z, Jian L, and HW Deng. Analyses and Comparison of Imputation-Based  
469 Association Methods. *PLoS ONE.* 2010; 5 (5): e10827. doi:10.1371/journal.pone.0010827.  
470  
471 Malhotra A, Sayuko K, Clifton B, Knowler WC, Baier LJ, and RL Hanson. Assessing Accuracy  
472 of Genotype Imputation in American Indians. *PLoS ONE.* 2014; 9 (7): e102544.  
473 doi:10.1371/journal.pone.0102544.  
474  
475 Das S, Abecasis G, and BL Browning. Genotype Imputation from Large Reference Panels.  
476 *Annual Review of Genomics and Human Genetics.* 2018; 19 (1): 73–96. doi: 10.1146/annurev-  
477 genom-083117-021602.  
478

479 Li N and M Stephens. Modeling linkage disequilibrium and identifying recombination hotspots  
480 using single-nucleotide polymorphism data. *Genetics*. 2003; 165(4): 2213-2233. doi:  
481 10.1093/genetics/165.4.2213.

482  
483 Lunter G. Haplotype matching in large cohorts using the Li and Stephens model. *Bioinformatics*.  
484 2019; 35 (5): 798–806. [doi: 10.1093/bioinformatics/bty735](https://doi.org/10.1093/bioinformatics/bty735).

485  
486 Stephens M, Smith NJ, and P Donnelly. A New Statistical Method for Haplotype Reconstruction  
487 from Population Data. *The American Journal of Human Genetics*. 2001; 68 (4): 978–89. doi:  
488 10.1086/319501.

489  
490 Williams AL, Patterson N, Glessner J, Hakonarson H, and D Reich. Phasing of Many Thousands  
491 of Genotyped Samples. *American Journal of Human Genetics*. 2012; 91 (2): 238–51.  
492 doi:10.1016/j.ajhg.2012.06.013.

493  
494 Loh PR, Danecek P, Palamara PF, Fuchsberger C, Reshef YA, HK Finucane, et al. Reference-  
495 Based Phasing Using the Haplotype Reference Consortium Panel. *Nature Genetics*. 2016; 48  
496 (11): 1443–48. doi:10.1038/ng.3679.

497  
498 Browning SR and BL Browning. Rapid and accurate haplotype phasing and missing-data  
499 inference for whole genome association studies by use of localized haplotype clustering. *Am J*  
500 *Hum Genet*. 2007; 91(5): 1084-1097. doi: 10.1086/521987

501

502 Browning BL and SR Browning. A unified approach to genotype imputation and haplotype-  
503 phase inference for large data sets of trios and unrelated individuals. *Am. J. Hum. Genet.* 2009;  
504 84: 210–223.

505

506 Browning BL and SR Browning. Improving the accuracy and efficiency of identity-by-descent  
507 detection in population data. *Genetics.* 2013 June 1; 194(2):459-471. doi:  
508 10.1534/genetics.113.150029

509

510 Browning BL, Zhou Y, and SR Browning. A One-Penny Imputed Genome from Next-  
511 Generation Reference Panels. *The American Journal of Human Genetics.* 2018; 103 (3): 338–48.  
512 doi: 10.1016/j.ajhg.2018.07.015.

513

514 Browning BL, Tian X, Zhou Y, and SR Browning. Fast two-stage phasing of large-scale  
515 sequence data. *Am J Hum Genet.* 2021; 108(10):1880-1890. doi:10.1016/j.ajhg.2021.08.005

516

517 Howie BN, Donnelly P, and J Marchini. A flexible and accurate genotype imputation method  
518 for the next generation of genome-wide association studies. *PLOS Genetics.* 2009; 5(6):  
519 e1000529. doi: 10.1371/journal.pgen.1000529.

520

521 Bycroft C, Freeman C, Petkova D, Band G, Elliot LT, Sharp K et al. The UK Biobank resource  
522 with deep phenotyping and genomic data. *Nature.* 2018 Oct 10; 562: 203-209.

523

524 Rubinacci S, Delaneau O, and J Marchini. Genotype imputation using the positional Burrows  
525 Wheeler transform. *PLOS Genetics*. 2020; 16(11):e1009049. doi: 10.1371/journal.pgen.1009049.  
526

527 Li Y, Willer CJ, Ding J, Scheet P and GR Abecasis. MaCH: using sequence and genotype data to  
528 estimate haplotypes and unobserved genotypes. *Genetic Epidemiology*. 2010 Nov 05; 34(8):  
529 816-834. doi: 10.1002/gepi.20533  
530

531 Delaneau O, J Marchini, and JF Zagury. A Linear Complexity Phasing Method for Thousands of  
532 Genomes. *Nature Methods*. 2011; 9 (2): 179–81.  
533

534 Delaneau O, Zagury JF, and J Marchini. Improved Whole-Chromosome Phasing for Disease and  
535 Population Genetic Studies. *Nature Methods*. 2013; 10 (1): 5–6.  
536

537 O’Connell J, Sharp K, Shrine N, Wain L, Hall I, Tobin M et al. Haplotype estimation for  
538 biobank-scale data sets. *Nature Genetics*. 2016 June 06; 48: 817-820.  
539

540 Delaneau O, Zagury JF, Robinson MR, Marchini JL, and ET Dermitzakis. Accurate, Scalable  
541 and Integrative Haplotype Estimation. *Nature Communications*. 2019; 10 (1): 5436.  
542

543 Howie B, Fuchsberger C, Stephens M, Marchini J, & GR Abecasis. Fast and accurate genotype  
544 imputation in genome-wide association studies through pre-phasing. *Nature Genetics*. 2012; 44:  
545 955-959.  
546

547 Fuchsberger C, Abecasis GR and DA Hinds. Minimac2: Faster Genotype Imputation.  
548 Bioinformatics. 2016 Aug 29; 31 (5): 782–84.  
549  
550 Das S, Forer L, Schonherr S, Sidore C, Locke AE, Kwong A, et al. Next-generation genotype  
551 imputation service and methods. Nature Genetics. 2016; 48(10): 1284-1287.  
552  
553 Junior GAF, Carneiro R, de Oliveira HN, Sargolzaei M, Costilla R, Ventura RV, et al.  
554 Imputation accuracy to whole-genome sequence in Nelore cattle. Genet Sel Evol. 2021; 53: 27.  
555 doi: 10.1186/s12711-021-00622-5  
556  
557 Ramnarine S, Zhang J, Chen LS, Culverhouse R, Duan W, Hancock DB, et al. When does choice  
558 of accuracy measure alter imputation accuracy assessments? PLOS ONE. 2015; 10(10):  
559 e0137601. doi: 10.1371/journal.pone.0137601.  
560  
561 Vergara C, Parker MM, Franco L, Cho MH, Valencia-Duarte AV, Beaty TH et al. Genotype  
562 imputation performance of three reference panels using African ancestry individuals. Human  
563 Genetics. 2018 April 10; 137: 281–292  
564  
565 Herzig AF, Nutile T, Babron MC, Ciullo M, Bellenguez C and AL Leutenegger. Strategies for  
566 Phasing and Imputation in a Population Isolate. Genetic Epidemiology. 2018 Jan an 10;  
567 42(2):201-203. doi:10.1002/gepi.22109.  
568

569 Sariya S, Lee JH, Mayeux R, Vardarajan BN, Reyes-Dumeyer D, Manly JJ, et al. Rare variants  
570 imputation in admixed populations: Comparison across reference panels and bioinformatics  
571 tools. *Frontiers in Genetics*. 2019; 10: 239. doi: 10.3389/fgene.2019.00239.

572

573 Danecek P, Bonfield JK, Liddle J, Marshall J, Ohan V, Pollard MO, et al. 2021. Twelve Years of  
574 SAMtools and BCFtools. *GigaScience*. 2021 Feb 16; 10(2). doi:10.1093/gigascience/giab008.

575

576 “Picard Toolkit.” 2019. Broad Institute. GitHub Repository. <https://broadinstitute.github.io/picard>

577

578 1000 Genomes Project Consortium, Abecasis GR, Altshuler D, Auton A, Brooks LD, Durbin RM,  
579 et al. A Map of Human Genome Variation from Population-Scale Sequencing. *Nature*. 2010; 467  
580 (7319): 1061–73. doi:10.1038/nature09534.

581

582 1000 Genomes Project Consortium, Auton A, Brooks LD, Durbin RM, Garrison EP, Kang HM, et  
583 al. A global reference for human genetic variation. *Nature*. 2015; 526 (7571): 68–74. doi:  
584 10.1038/nature15393.

585

586 Sudmant PH, Rausch T, Gardner EJ, Handsaker RE, Abyzov A, Huddleston J, et al. An  
587 integrated map of structural variation in 2,504 human genomes. *Nature*. 2015; 526 (7571): 75–  
588 81. doi: 10.1038/nature15394.

589

590 Liu EY, Buyske S, Aragaki AK, Peters U, Boerwinkle E, Carlson C et al. Genotype imputation  
591 of MetaboChip SNPs using a study-specific reference panel of ~4,000 haplotypes in African

592 Americans from the Women's Health Initiative. *Genet Epidemiol.* 2012 Feb; 36(2) 107-117. doi:  
593 10.1002/gepi.21603.

594

595 Chen SF, Dias R, Evans D, Salfati EL, Liu S, Wineinger NE, et al. Genotype imputation and  
596 variability in polygenic risk score estimation. *Genome Medicine.* 2020; 12(1):100. doi:  
597 10.1186/s13073-020-00801-x.

598

599 Evans DM and LR Cardon. A comparison of linkage disequilibrium patterns and estimated  
600 population recombination rates across multiple populations. *American Journal of Human*  
601 *Genetics.* 2005; 76(4): 681-687. doi: 10.1086/429274

602

603 Shi S, Yuan N, Yang M, Du Z, Wang J, Sheng X, et al. Comprehensive assessment of genotype  
604 imputation performance. *Human Heredity.* 2019; 83(3):107–16. doi:10.1159/000489758.

605

606 Lin P, Hartz SM, Zhang Z, Saccone SF, Wang J, Tischfield JA, et al. A new statistic to evaluate  
607 imputation reliability. *PLoS ONE.* 2010; 5(3): e9697. doi: 10.1371/journal.pone.0009697.

608

609 Byrska-Bishop M, Evani US, Zhao X, Basile AO, Abel HJ, Regier AA, et al. High coverage  
610 whole genome sequencing of the expanded 1000 genomes project cohort including 602 trios.

611 BioRxiv [Preprint]2021 bioRxiv 430068 [posted 2021 Feb 06; cited 2021 Oct 28] Available

612 from: <https://www.biorxiv.org/content/10.1101/2021.02.06.430068v1>

613

614 Ding C and S Jin. 2009. High-throughput methods for SNP genotyping. *Methods Mol Biol.*  
615 2009; 578: 245-254. doi: 10.1007/978-1-60327-411-1\_16.  
616  
617 International HapMap 3 Consortium, Altshuler DM, Gibbs RA, Peltonen L, Dermitzakis E,  
618 Schaffner SF, et al. Integrating common and rare genetic variation in diverse human populations.  
619 *Nature.* 2010; 467(7311): 52–58. doi: 10.1038/nature09298.  
620  
621 International HapMap Consortium. A haplotype map of the human genome. *Nature.* 2005;  
622 437(7063): 1299–1320. doi: 10.1038/nature04226.  
623  
624 Ragoussis J. Genotyping technologies for genetic research. *Annual Review of Genomics and*  
625 *Human Genetics.* 2009; 10:117–133. doi:10.1146/annurev-genom-082908-150116.  
626  
627 Roshyara NR, Horn K, Kirsten H, Ahnert P and M Scholz. Comparing performance of modern  
628 genotype imputation methods in different ethnicities. *Scientific Reports.* 2016; 6(1):34386. doi:  
629 10.1038/srep34386.  
630  
631 Oliveros JC. Venny: An interactive tool for comparing lists with Venn diagrams. 2007. from:  
632 <https://bioinfogp.cnb.csic.es/tools/venny/index.html>  
633  
634  
635



## 636 Supporting Information

637 **S1 Table Comparison of all combinations of phasing and imputation tool, reference panel,**  
 638 **phasing approach, and chip dataset.**

| Reference     | Chip       | Phasing         | Combination          | Concordance | r2    | IQS   |
|---------------|------------|-----------------|----------------------|-------------|-------|-------|
| 1000GP-Phase3 | Omni       | Reference-based | ShapelT4-Beagle5.2   | 0.993       | 0.839 | 0.818 |
| 1000GP-Phase3 | Omni       | Reference-based | Beagle5.2-Beagle5.2  | 0.993       | 0.838 | 0.816 |
| 1000GP-Phase3 | Omni       | Reference-based | Eagle2.4.1-Beagle5.2 | 0.993       | 0.836 | 0.813 |
| 1000GP-Phase3 | Omni       | Reference-based | Beagle5.2-Impute5    | 0.992       | 0.834 | 0.824 |
| 1000GP-Phase3 | Omni       | Reference-based | ShapelT4-Impute5     | 0.992       | 0.832 | 0.824 |
| 1000GP-Phase3 | Omni       | Reference-based | Eagle2.4.1-Impute5   | 0.992       | 0.832 | 0.822 |
| 1000GP-Phase3 | Omni       | Reference-based | ShapelT4-Minimac4    | 0.992       | 0.832 | 0.804 |
| 1000GP-Phase3 | Omni       | Reference-based | Beagle5.2-Minimac4   | 0.992       | 0.830 | 0.804 |
| 1000GP-Phase3 | Omni       | Reference-based | Eagle2.4.1-Minimac4  | 0.992       | 0.829 | 0.803 |
| 1000GP-Phase3 | Omni       | Reference-free  | Beagle5.2-Impute5    | 0.990       | 0.787 | 0.742 |
| 1000GP-Phase3 | Omni       | Reference-free  | Beagle5.2-Minimac4   | 0.990       | 0.785 | 0.725 |
| 1000GP-Phase3 | Omni       | Reference-free  | ShapelT4-Impute5     | 0.990       | 0.781 | 0.743 |
| 1000GP-Phase3 | Omni       | Reference-free  | Beagle5.2-Beagle5.2  | 0.991       | 0.781 | 0.716 |
| 1000GP-Phase3 | Affymetrix | Reference-based | ShapelT4-Beagle5.2   | 0.988       | 0.780 | 0.741 |
| 1000GP-Phase3 | Omni       | Reference-free  | ShapelT4-Minimac4    | 0.990       | 0.780 | 0.726 |
| 1000GP-Phase3 | Affymetrix | Reference-based | Beagle5.2-Beagle5.2  | 0.988       | 0.779 | 0.743 |
| 1000GP-Phase3 | Omni       | Reference-free  | ShapelT4-Beagle5.2   | 0.991       | 0.778 | 0.726 |
| 1000GP-Phase3 | Affymetrix | Reference-based | Eagle2.4.1-Beagle5.2 | 0.988       | 0.776 | 0.739 |
| 1000GP-Phase3 | Omni       | Reference-free  | Eagle2.4.1-Impute5   | 0.990       | 0.773 | 0.723 |
| 1000GP-Phase3 | Omni       | Reference-free  | Eagle2.4.1-Beagle5.2 | 0.991       | 0.770 | 0.703 |

|               |            |                 |                      |       |       |       |
|---------------|------------|-----------------|----------------------|-------|-------|-------|
| 1000GP-Phase3 | Affymetrix | Reference-based | Beagle5.2-Impute5    | 0.987 | 0.769 | 0.758 |
| 1000GP-Phase3 | Affymetrix | Reference-based | ShapelT4-Impute5     | 0.987 | 0.768 | 0.755 |
| 1000GP-Phase3 | Omni       | Reference-free  | Eagle2.4.1-Minimac4  | 0.990 | 0.768 | 0.707 |
| 1000GP-Phase3 | Affymetrix | Reference-based | ShapelT4-Minimac4    | 0.987 | 0.768 | 0.732 |
| 1000GP-Phase3 | Affymetrix | Reference-based | Beagle5.2-Minimac4   | 0.987 | 0.768 | 0.735 |
| 1000GP-Phase3 | Affymetrix | Reference-based | Eagle2.4.1-Impute5   | 0.987 | 0.765 | 0.754 |
| 1000GP-Phase3 | Affymetrix | Reference-based | Eagle2.4.1-Minimac4  | 0.987 | 0.761 | 0.730 |
| 1000GP-30x    | Omni       | Reference-based | ShapelT4-Impute5     | 0.994 | 0.728 | 0.746 |
| 1000GP-30x    | Omni       | Reference-based | Beagle5.2-Impute5    | 0.994 | 0.727 | 0.745 |
| 1000GP-30x    | Omni       | Reference-based | ShapelT4-Beagle5.2   | 0.994 | 0.724 | 0.742 |
| 1000GP-30x    | Omni       | Reference-based | Beagle5.2-Beagle5.2  | 0.994 | 0.723 | 0.740 |
| 1000GP-30x    | Omni       | Reference-based | Eagle2.4.1-Impute5   | 0.994 | 0.723 | 0.742 |
| 1000GP-30x    | Omni       | Reference-based | Eagle2.4.1-Beagle5.2 | 0.994 | 0.718 | 0.736 |
| 1000GP-Phase3 | Affymetrix | Reference-free  | ShapelT4-Beagle5.2   | 0.986 | 0.704 | 0.631 |
| 1000GP-Phase3 | Affymetrix | Reference-free  | Beagle5.2-Impute5    | 0.984 | 0.699 | 0.658 |
| 1000GP-30x    | Omni       | Reference-based | ShapelT4-Minimac4    | 0.993 | 0.698 | 0.714 |
| 1000GP-Phase3 | Affymetrix | Reference-free  | ShapelT4-Minimac4    | 0.984 | 0.697 | 0.633 |
| 1000GP-Phase3 | Affymetrix | Reference-free  | ShapelT4-Impute5     | 0.984 | 0.697 | 0.659 |
| 1000GP-Phase3 | Affymetrix | Reference-free  | Beagle5.2-Minimac4   | 0.984 | 0.697 | 0.633 |
| 1000GP-Phase3 | Affymetrix | Reference-free  | Beagle5.2-Beagle5.2  | 0.985 | 0.696 | 0.631 |
| 1000GP-30x    | Omni       | Reference-based | Beagle5.2-Minimac4   | 0.993 | 0.696 | 0.712 |
| 1000GP-30x    | Omni       | Reference-based | Eagle2.4.1-Minimac4  | 0.992 | 0.692 | 0.708 |
| 1000GP-30x    | Affymetrix | Reference-based | ShapelT4-Impute5     | 0.991 | 0.687 | 0.713 |
| 1000GP-30x    | Affymetrix | Reference-based | Beagle5.2-Impute5    | 0.991 | 0.685 | 0.711 |

|               |            |                 |                      |       |       |       |
|---------------|------------|-----------------|----------------------|-------|-------|-------|
| 1000GP-30x    | Affymetrix | Reference-based | ShapelT4-Beagle5.2   | 0.992 | 0.682 | 0.706 |
| 1000GP-Phase3 | Affymetrix | Reference-free  | Eagle2.4.1-Minimac4  | 0.983 | 0.681 | 0.617 |
| 1000GP-Phase3 | Affymetrix | Reference-free  | Eagle2.4.1-Beagle5.2 | 0.985 | 0.680 | 0.606 |
| 1000GP-30x    | Affymetrix | Reference-based | Beagle5.2-Beagle5.2  | 0.992 | 0.680 | 0.703 |
| 1000GP-30x    | Affymetrix | Reference-based | Eagle2.4.1-Impute5   | 0.991 | 0.679 | 0.706 |
| 1000GP-Phase3 | Affymetrix | Reference-free  | Eagle2.4.1-Impute5   | 0.983 | 0.679 | 0.641 |
| 1000GP-30x    | Affymetrix | Reference-based | Eagle2.4.1-Beagle5.2 | 0.991 | 0.673 | 0.698 |
| 1000GP-30x    | Omni       | Reference-free  | ShapelT4-Impute5     | 0.993 | 0.656 | 0.678 |
| 1000GP-30x    | Affymetrix | Reference-based | ShapelT4-Minimac4    | 0.990 | 0.654 | 0.677 |
| 1000GP-Phase3 | Customized | Reference-based | ShapelT4-Beagle5.2   | 0.978 | 0.652 | 0.608 |
| 1000GP-30x    | Affymetrix | Reference-based | Beagle5.2-Minimac4   | 0.990 | 0.652 | 0.675 |
| 1000GP-30x    | Omni       | Reference-free  | Beagle5.2-Impute5    | 0.992 | 0.652 | 0.675 |
| 1000GP-30x    | Affymetrix | Reference-based | Eagle2.4.1-Minimac4  | 0.990 | 0.646 | 0.669 |
| 1000GP-30x    | Omni       | Reference-free  | Eagle2.4.1-Impute5   | 0.992 | 0.640 | 0.664 |
| 1000GP-Phase3 | Customized | Reference-based | Eagle2.4.1-Beagle5.2 | 0.977 | 0.637 | 0.591 |
| 1000GP-30x    | Omni       | Reference-free  | ShapelT4-Beagle5.2   | 0.993 | 0.636 | 0.657 |
| 1000GP-Phase3 | Customized | Reference-based | Beagle5.2-Beagle5.2  | 0.977 | 0.636 | 0.593 |
| 1000GP-30x    | Omni       | Reference-free  | Beagle5.2-Beagle5.2  | 0.993 | 0.634 | 0.656 |
| 1000GP-Phase3 | Customized | Reference-based | ShapelT4-Minimac4    | 0.975 | 0.634 | 0.604 |
| 1000GP-Phase3 | Customized | Reference-based | ShapelT4-Impute5     | 0.975 | 0.628 | 0.641 |
| 1000GP-Phase3 | Customized | Reference-based | Beagle5.2-Minimac4   | 0.975 | 0.624 | 0.586 |
| 1000GP-Phase3 | Customized | Reference-based | Eagle2.4.1-Minimac4  | 0.974 | 0.620 | 0.588 |
| 1000GP-Phase3 | Customized | Reference-based | Eagle2.4.1-Impute5   | 0.975 | 0.620 | 0.630 |
| 1000GP-30x    | Omni       | Reference-free  | Eagle2.4.1-Beagle5.2 | 0.992 | 0.619 | 0.642 |

|               |            |                 |                      |       |       |       |
|---------------|------------|-----------------|----------------------|-------|-------|-------|
| 1000GP-30x    | Qmnl       | Reference-free  | ShapelT4-Minimac4    | 0.991 | 0.619 | 0.638 |
| 1000GP-Phase3 | Customized | Reference-based | Beagle5.2-Impute5    | 0.975 | 0.619 | 0.625 |
| 1000GP-30x    | Qmnl       | Reference-free  | Beagle5.2-Minimac4   | 0.991 | 0.617 | 0.637 |
| 1000GP-30x    | Qmnl       | Reference-free  | Eagle2.4.1-Minimac4  | 0.991 | 0.604 | 0.625 |
| 1000GP-30x    | Customized | Reference-based | ShapelT4-Impute5     | 0.982 | 0.592 | 0.638 |
| 1000GP-30x    | Customized | Reference-based | ShapelT4-Beagle5.2   | 0.984 | 0.589 | 0.629 |
| 1000GP-30x    | Customized | Reference-based | Beagle5.2-Impute5    | 0.982 | 0.586 | 0.632 |
| 1000GP-30x    | Customized | Reference-based | Beagle5.2-Beagle5.2  | 0.984 | 0.581 | 0.621 |
| 1000GP-30x    | Customized | Reference-based | Eagle2.4.1-Impute5   | 0.982 | 0.581 | 0.628 |
| 1000GP-30x    | Affymetrix | Reference-free  | ShapelT4-Impute5     | 0.988 | 0.580 | 0.613 |
| 1000GP-30x    | Customized | Reference-based | Eagle2.4.1-Beagle5.2 | 0.983 | 0.576 | 0.617 |
| 1000GP-30x    | Affymetrix | Reference-free  | Beagle5.2-Impute5    | 0.987 | 0.575 | 0.608 |
| 1000GP-30x    | Affymetrix | Reference-free  | Eagle2.4.1-Impute5   | 0.987 | 0.561 | 0.596 |
| 1000GP-30x    | Affymetrix | Reference-free  | ShapelT4-Beagle5.2   | 0.988 | 0.557 | 0.586 |
| 1000GP-30x    | Affymetrix | Reference-free  | Beagle5.2-Beagle5.2  | 0.988 | 0.553 | 0.583 |
| 1000GP-30x    | Affymetrix | Reference-free  | ShapelT4-Minimac4    | 0.986 | 0.540 | 0.568 |
| 1000GP-30x    | Customized | Reference-based | ShapelT4-Minimac4    | 0.980 | 0.539 | 0.578 |
| 1000GP-30x    | Affymetrix | Reference-free  | Eagle2.4.1-Beagle5.2 | 0.987 | 0.536 | 0.568 |
| 1000GP-30x    | Affymetrix | Reference-free  | Beagle5.2-Minimac4   | 0.986 | 0.535 | 0.564 |
| 1000GP-30x    | Customized | Reference-based | Beagle5.2-Minimac4   | 0.980 | 0.533 | 0.572 |
| 1000GP-30x    | Customized | Reference-based | Eagle2.4.1-Minimac4  | 0.980 | 0.529 | 0.570 |
| 1000GP-30x    | Affymetrix | Reference-free  | Eagle2.4.1-Minimac4  | 0.986 | 0.518 | 0.548 |
| 1000GP-Phase3 | Customized | Reference-free  | ShapelT4-Beagle5.2   | 0.970 | 0.509 | 0.430 |
| 1000GP-Phase3 | Customized | Reference-free  | ShapelT4-Minimac4    | 0.967 | 0.503 | 0.432 |

|               |            |                |                      |       |       |       |
|---------------|------------|----------------|----------------------|-------|-------|-------|
| 1000GP-Phase3 | Customized | Reference-free | ShapelT4-Impute5     | 0.967 | 0.494 | 0.484 |
| 1000GP-Phase3 | Customized | Reference-free | Beagle5.2-Minimac4   | 0.967 | 0.494 | 0.429 |
| 1000GP-Phase3 | Customized | Reference-free | Beagle5.2-Beagle5.2  | 0.970 | 0.492 | 0.427 |
| 1000GP-Phase3 | Customized | Reference-free | Beagle5.2-Impute5    | 0.967 | 0.486 | 0.480 |
| 1000GP-Phase3 | Customized | Reference-free | Eagle2.4.1-Beagle5.2 | 0.968 | 0.479 | 0.417 |
| 1000GP-Phase3 | Customized | Reference-free | Eagle2.4.1-Minimac4  | 0.965 | 0.471 | 0.401 |
| 1000GP-Phase3 | Customized | Reference-free | Eagle2.4.1-Impute5   | 0.965 | 0.469 | 0.461 |
| 1000GP-30x    | Customized | Reference-free | ShapelT4-Impute5     | 0.972 | 0.404 | 0.460 |
| 1000GP-30x    | Customized | Reference-free | Beagle5.2-Impute5    | 0.972 | 0.399 | 0.456 |
| 1000GP-30x    | Customized | Reference-free | Eagle2.4.1-Impute5   | 0.970 | 0.374 | 0.431 |
| 1000GP-30x    | Customized | Reference-free | ShapelT4-Beagle5.2   | 0.974 | 0.367 | 0.414 |
| 1000GP-30x    | Customized | Reference-free | Beagle5.2-Beagle5.2  | 0.973 | 0.362 | 0.409 |
| 1000GP-30x    | Customized | Reference-free | Eagle2.4.1-Beagle5.2 | 0.972 | 0.335 | 0.383 |
| 1000GP-30x    | Customized | Reference-free | ShapelT4-Minimac4    | 0.970 | 0.334 | 0.377 |
| 1000GP-30x    | Customized | Reference-free | Beagle5.2-Minimac4   | 0.970 | 0.328 | 0.372 |
| 1000GP-30x    | Customized | Reference-free | Eagle2.4.1-Minimac4  | 0.968 | 0.303 | 0.347 |

639 All 108 combinations of phasing software, reference-based/reference-free phasing, imputation  
640 software, imputation reference panel, and input dataset, compared across the three accuracy  
641 metrics, concordance,  $r^2$ , and IQS. The ranking/ordering is by  $r^2$  as it attempts to correct for  
642 MAF-bias and is a commonly used metric for imputation accuracy.

643

644

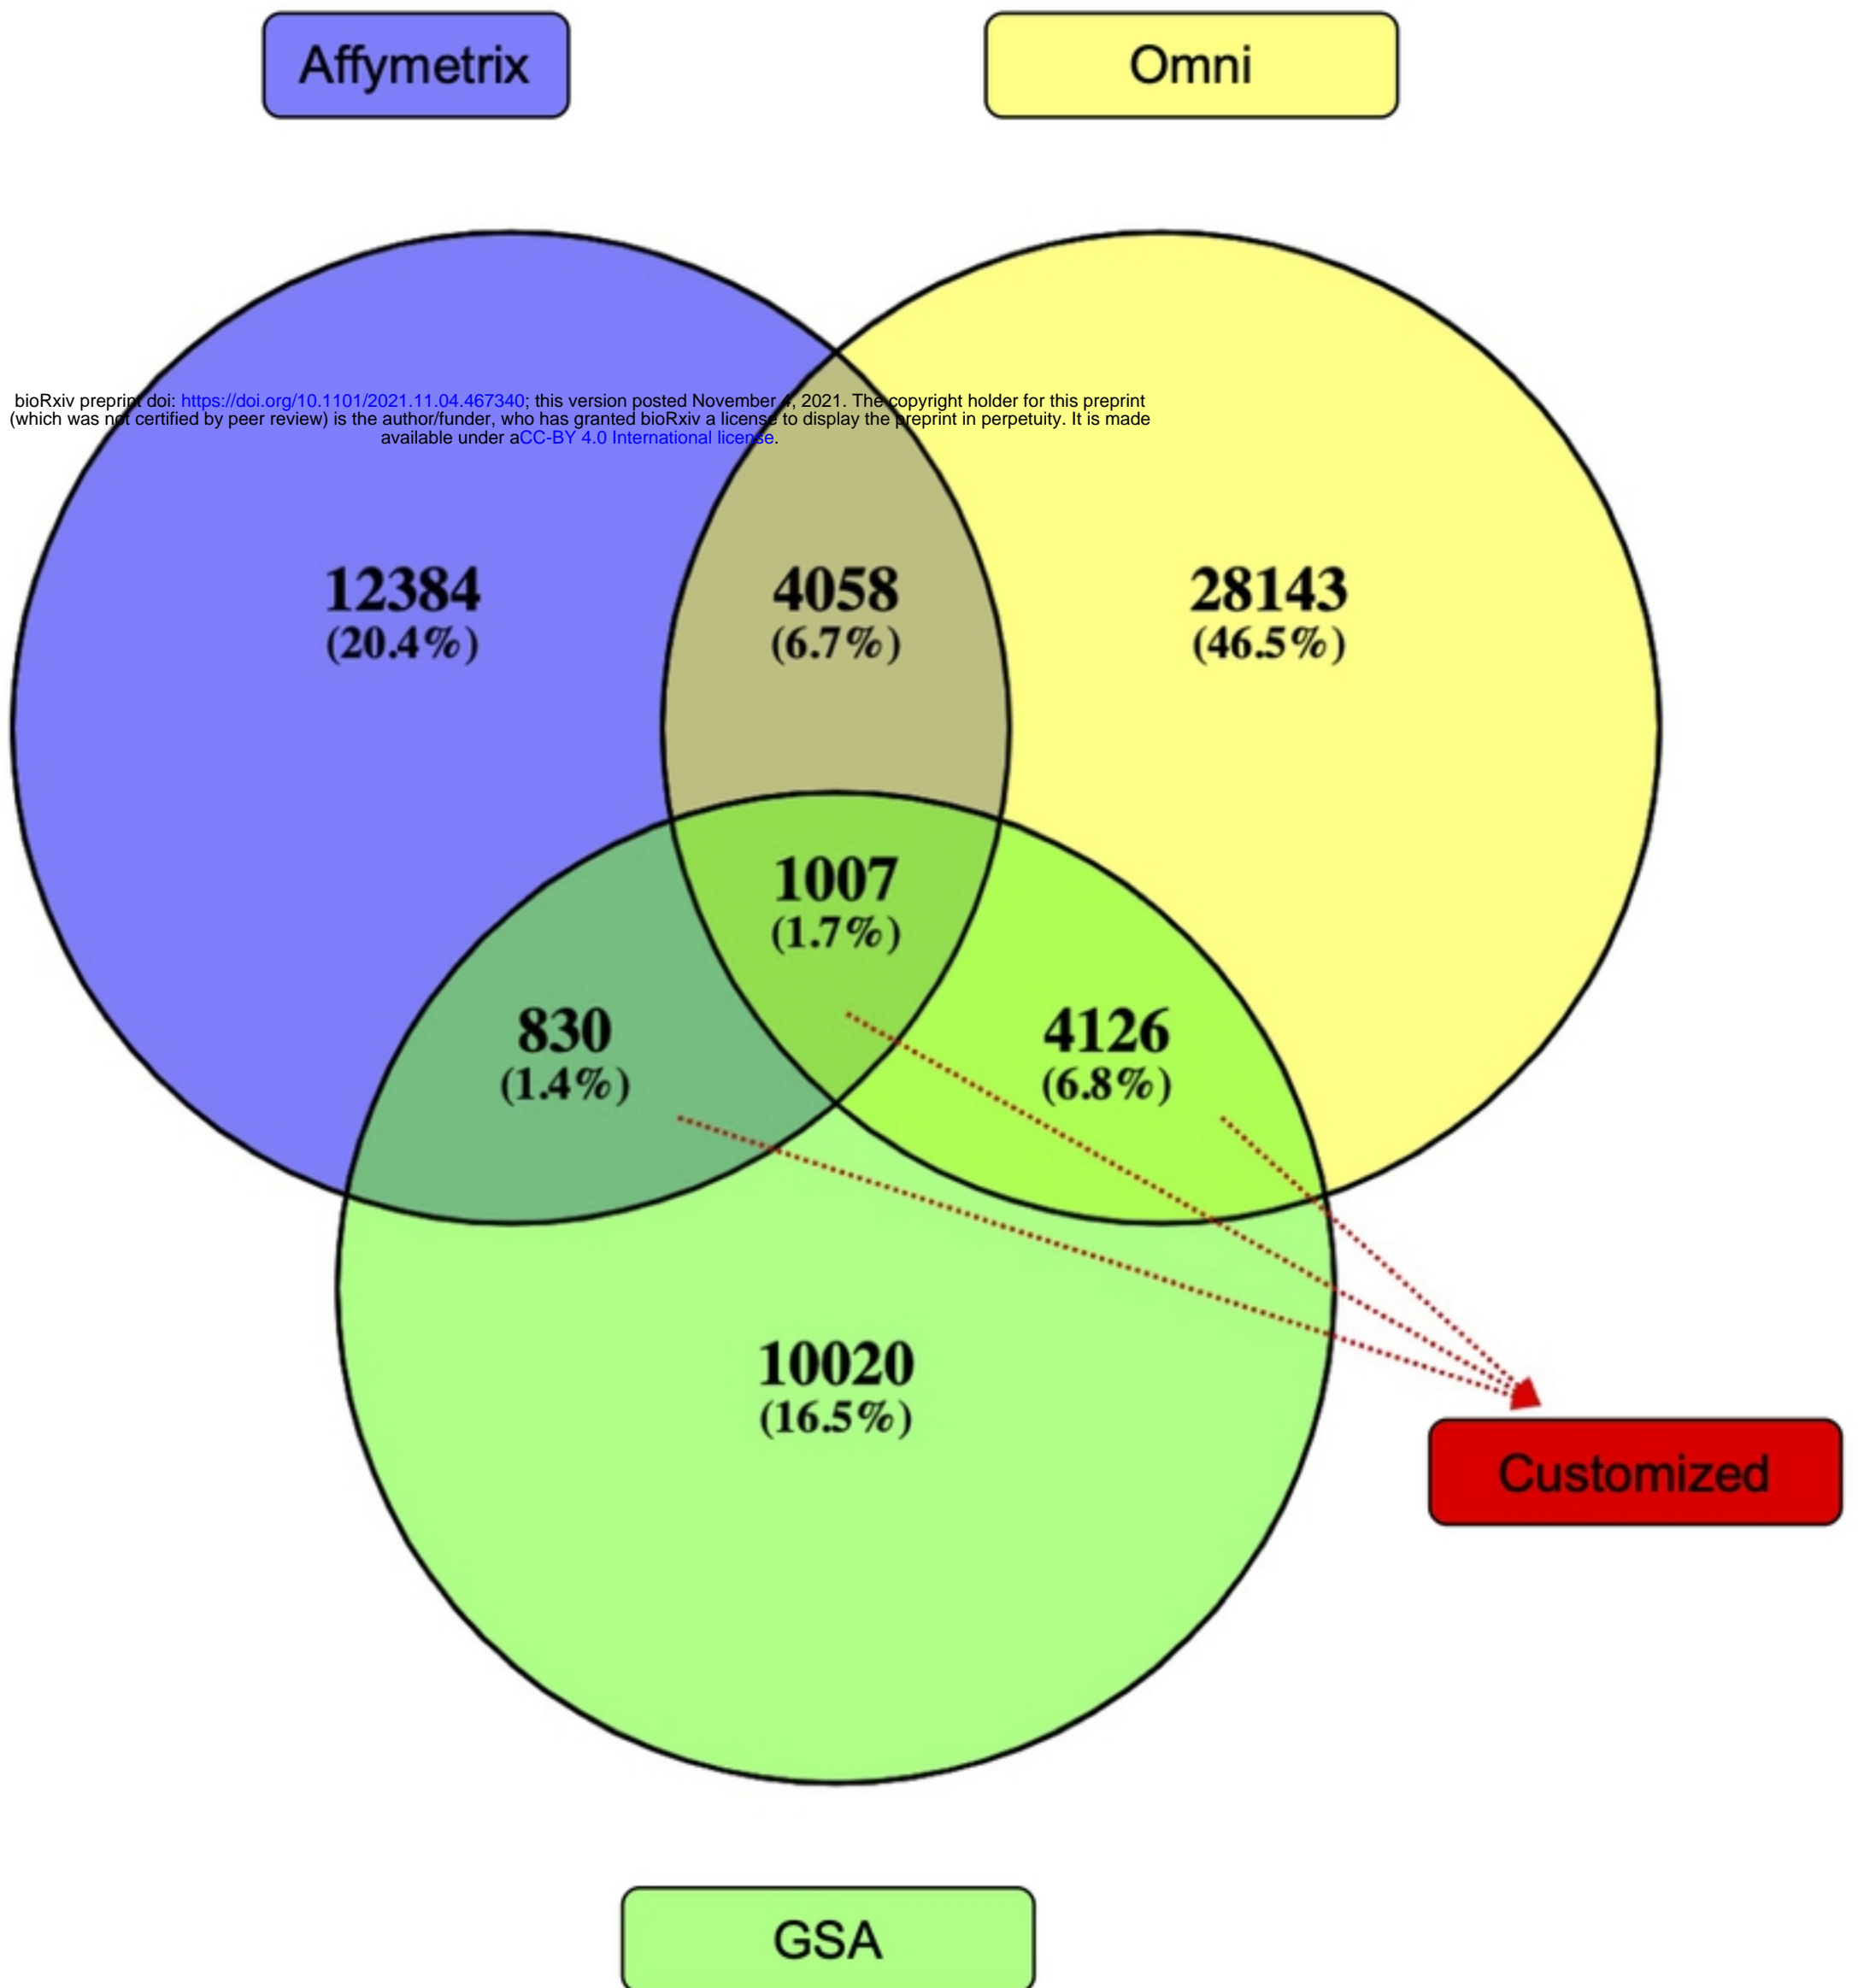

Figure 1

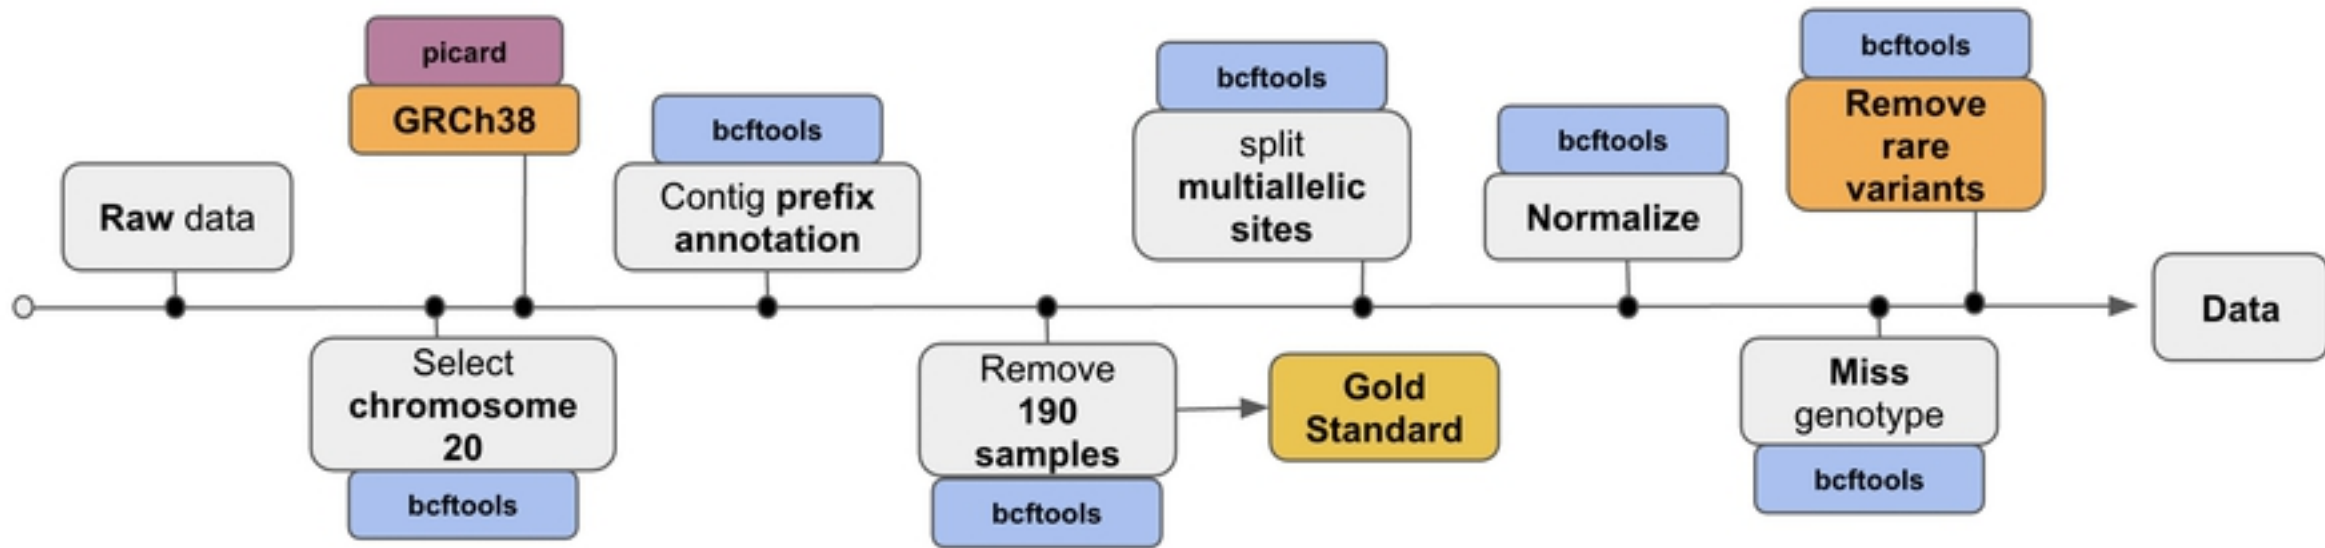

Figure 2



Omni

WGS

bioRxiv preprint doi: <https://doi.org/10.1101/2021.11.04.467340>; this version posted November 4, 2021. The copyright holder for this preprint (which was not certified by peer review) is the author/funder, who has granted bioRxiv a license to display the preprint in perpetuity. It is made available under aCC-BY 4.0 International license.

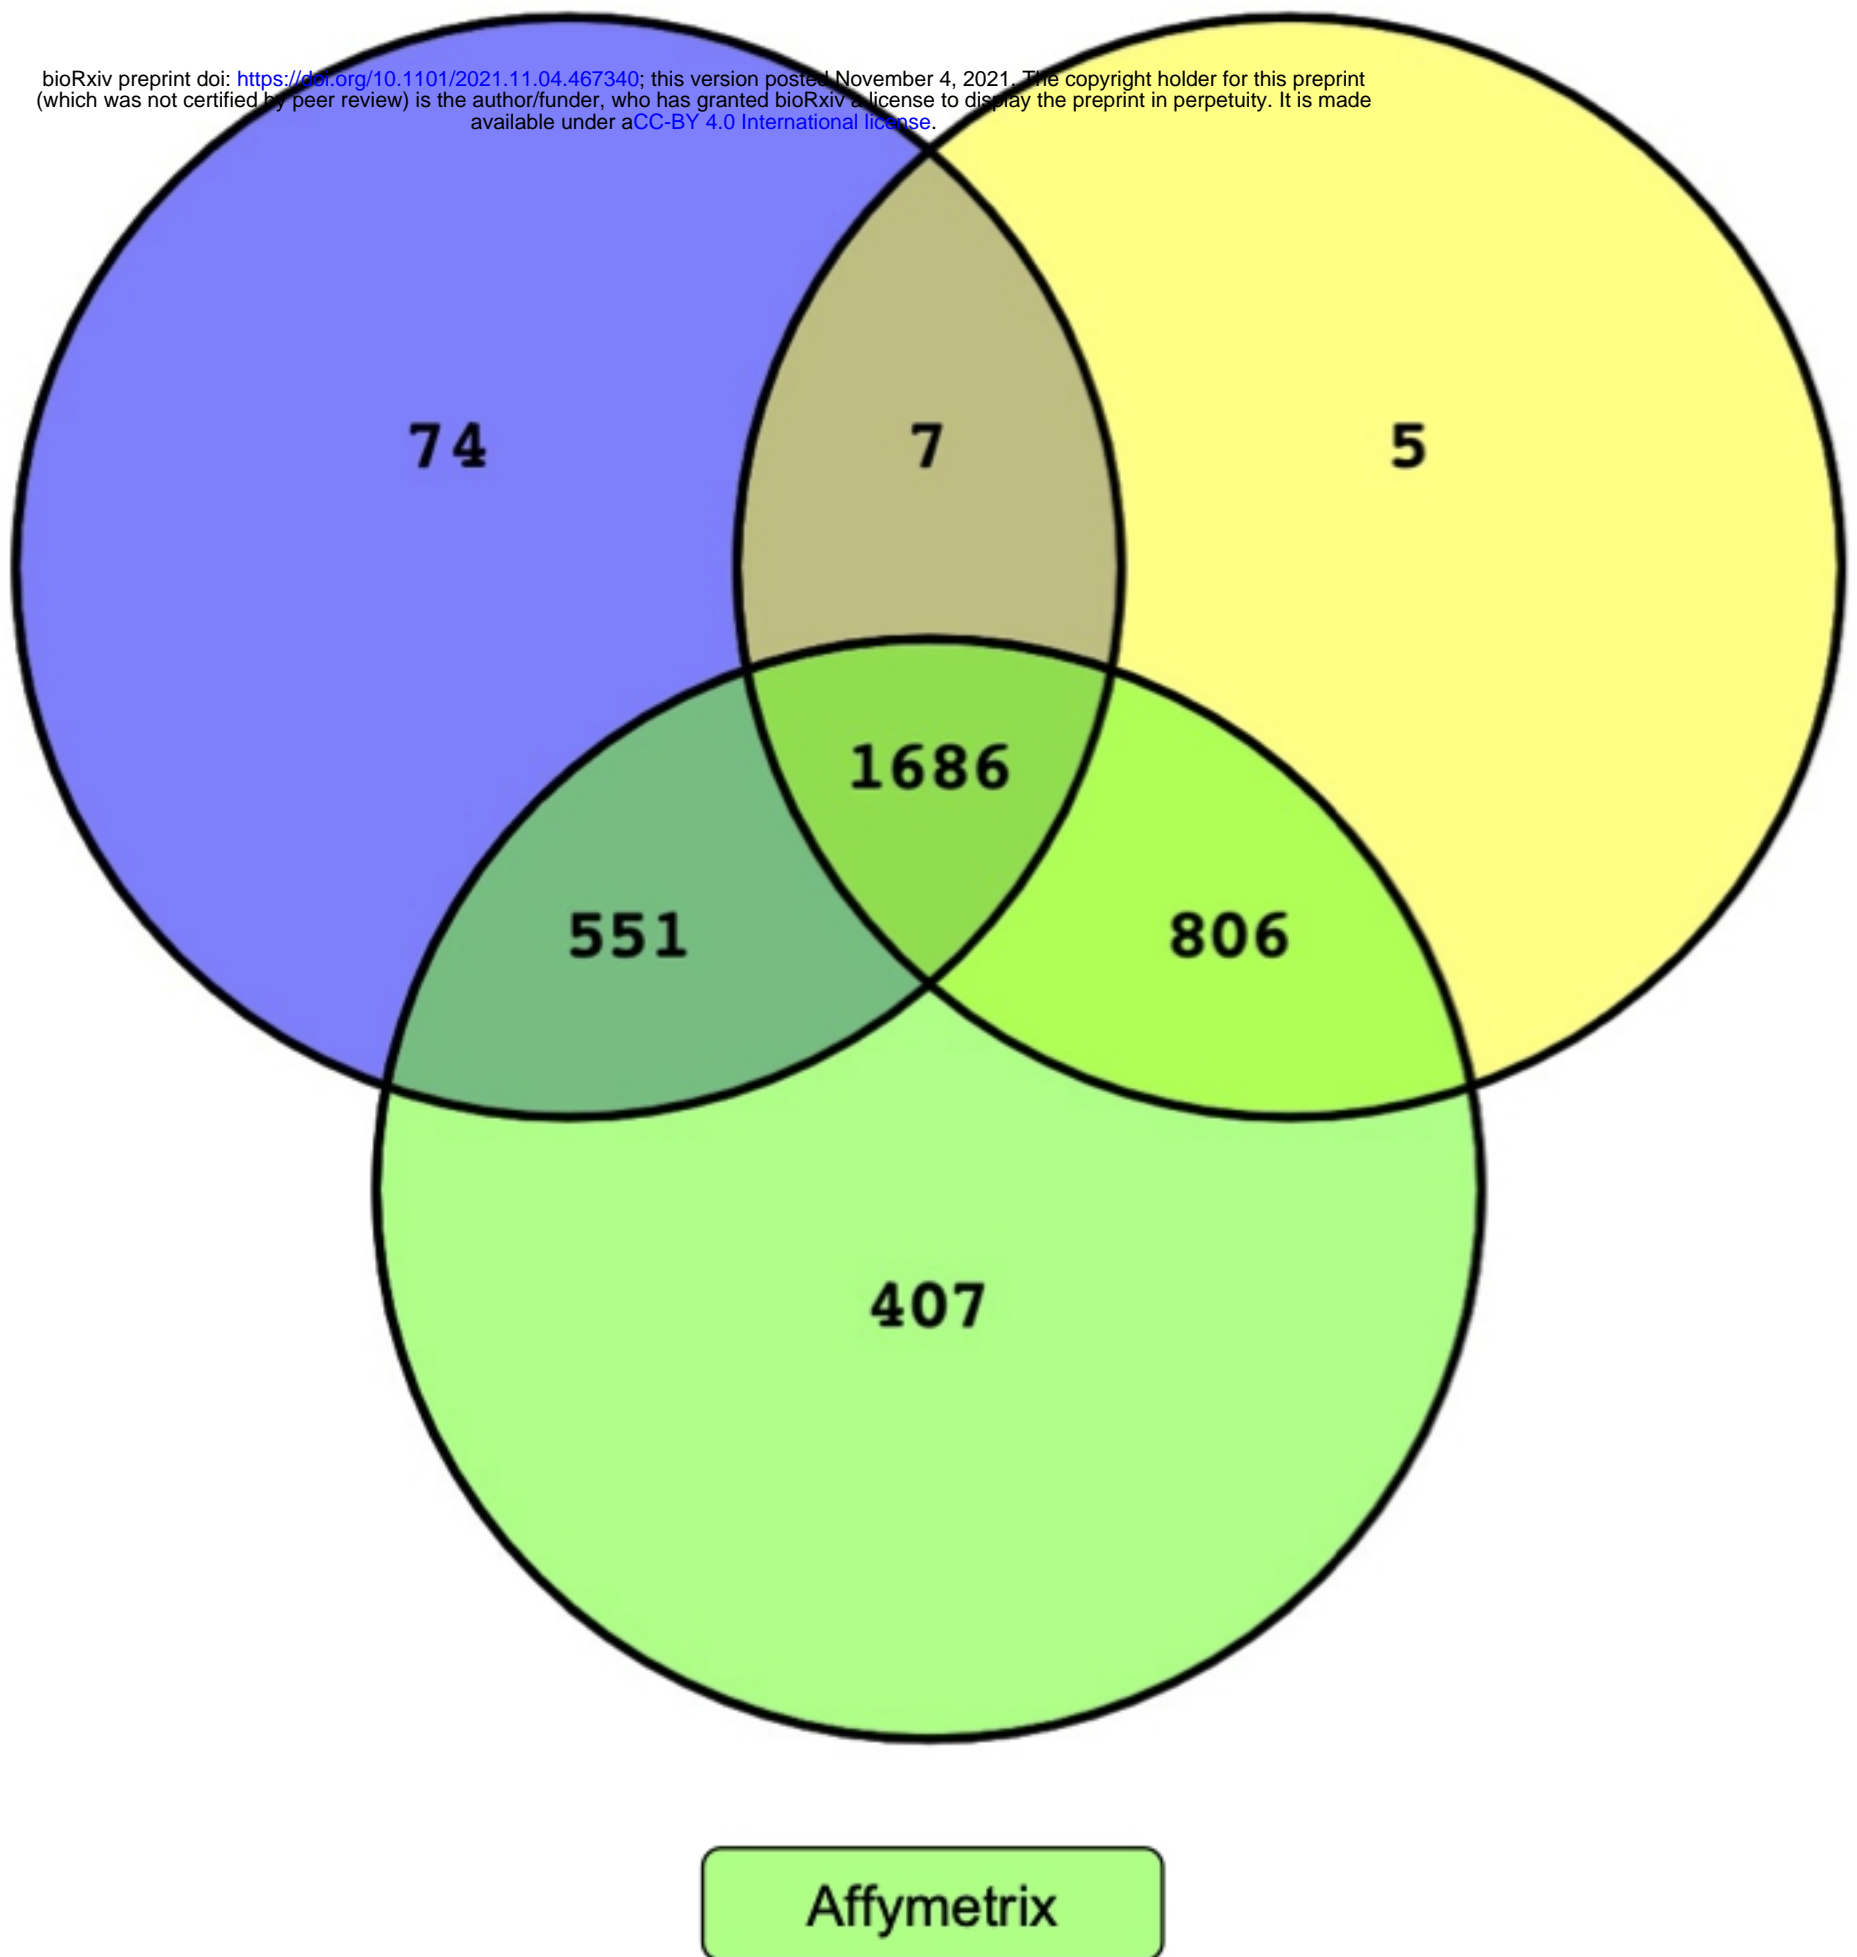

Affymetrix

Figure 3



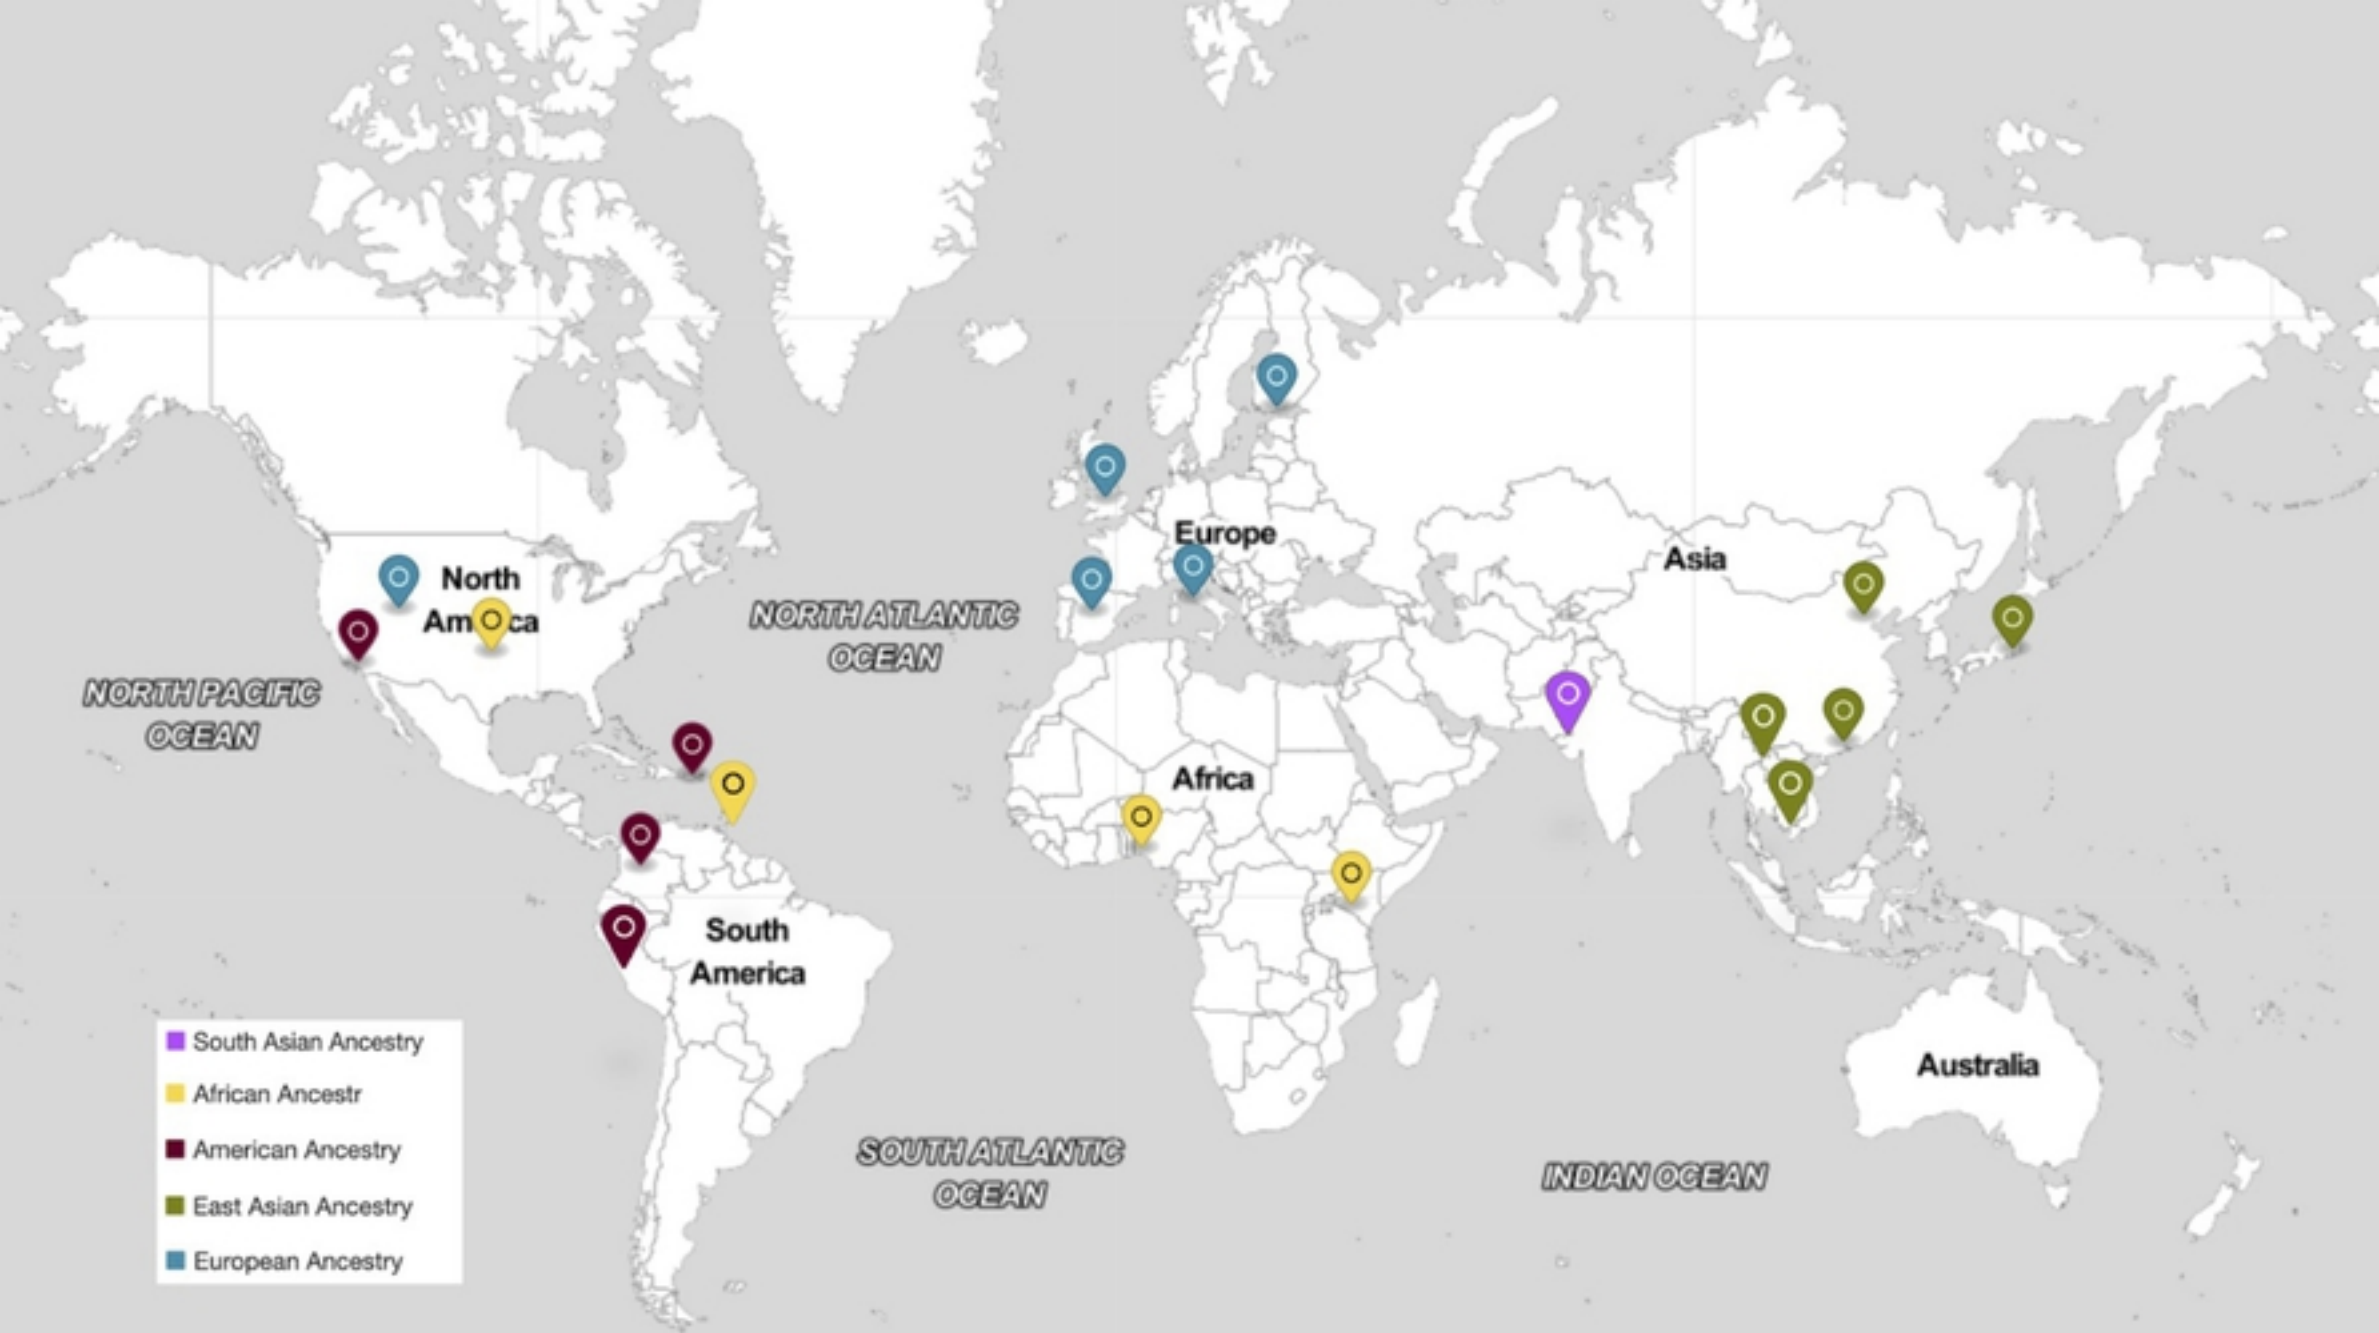

Figure 4

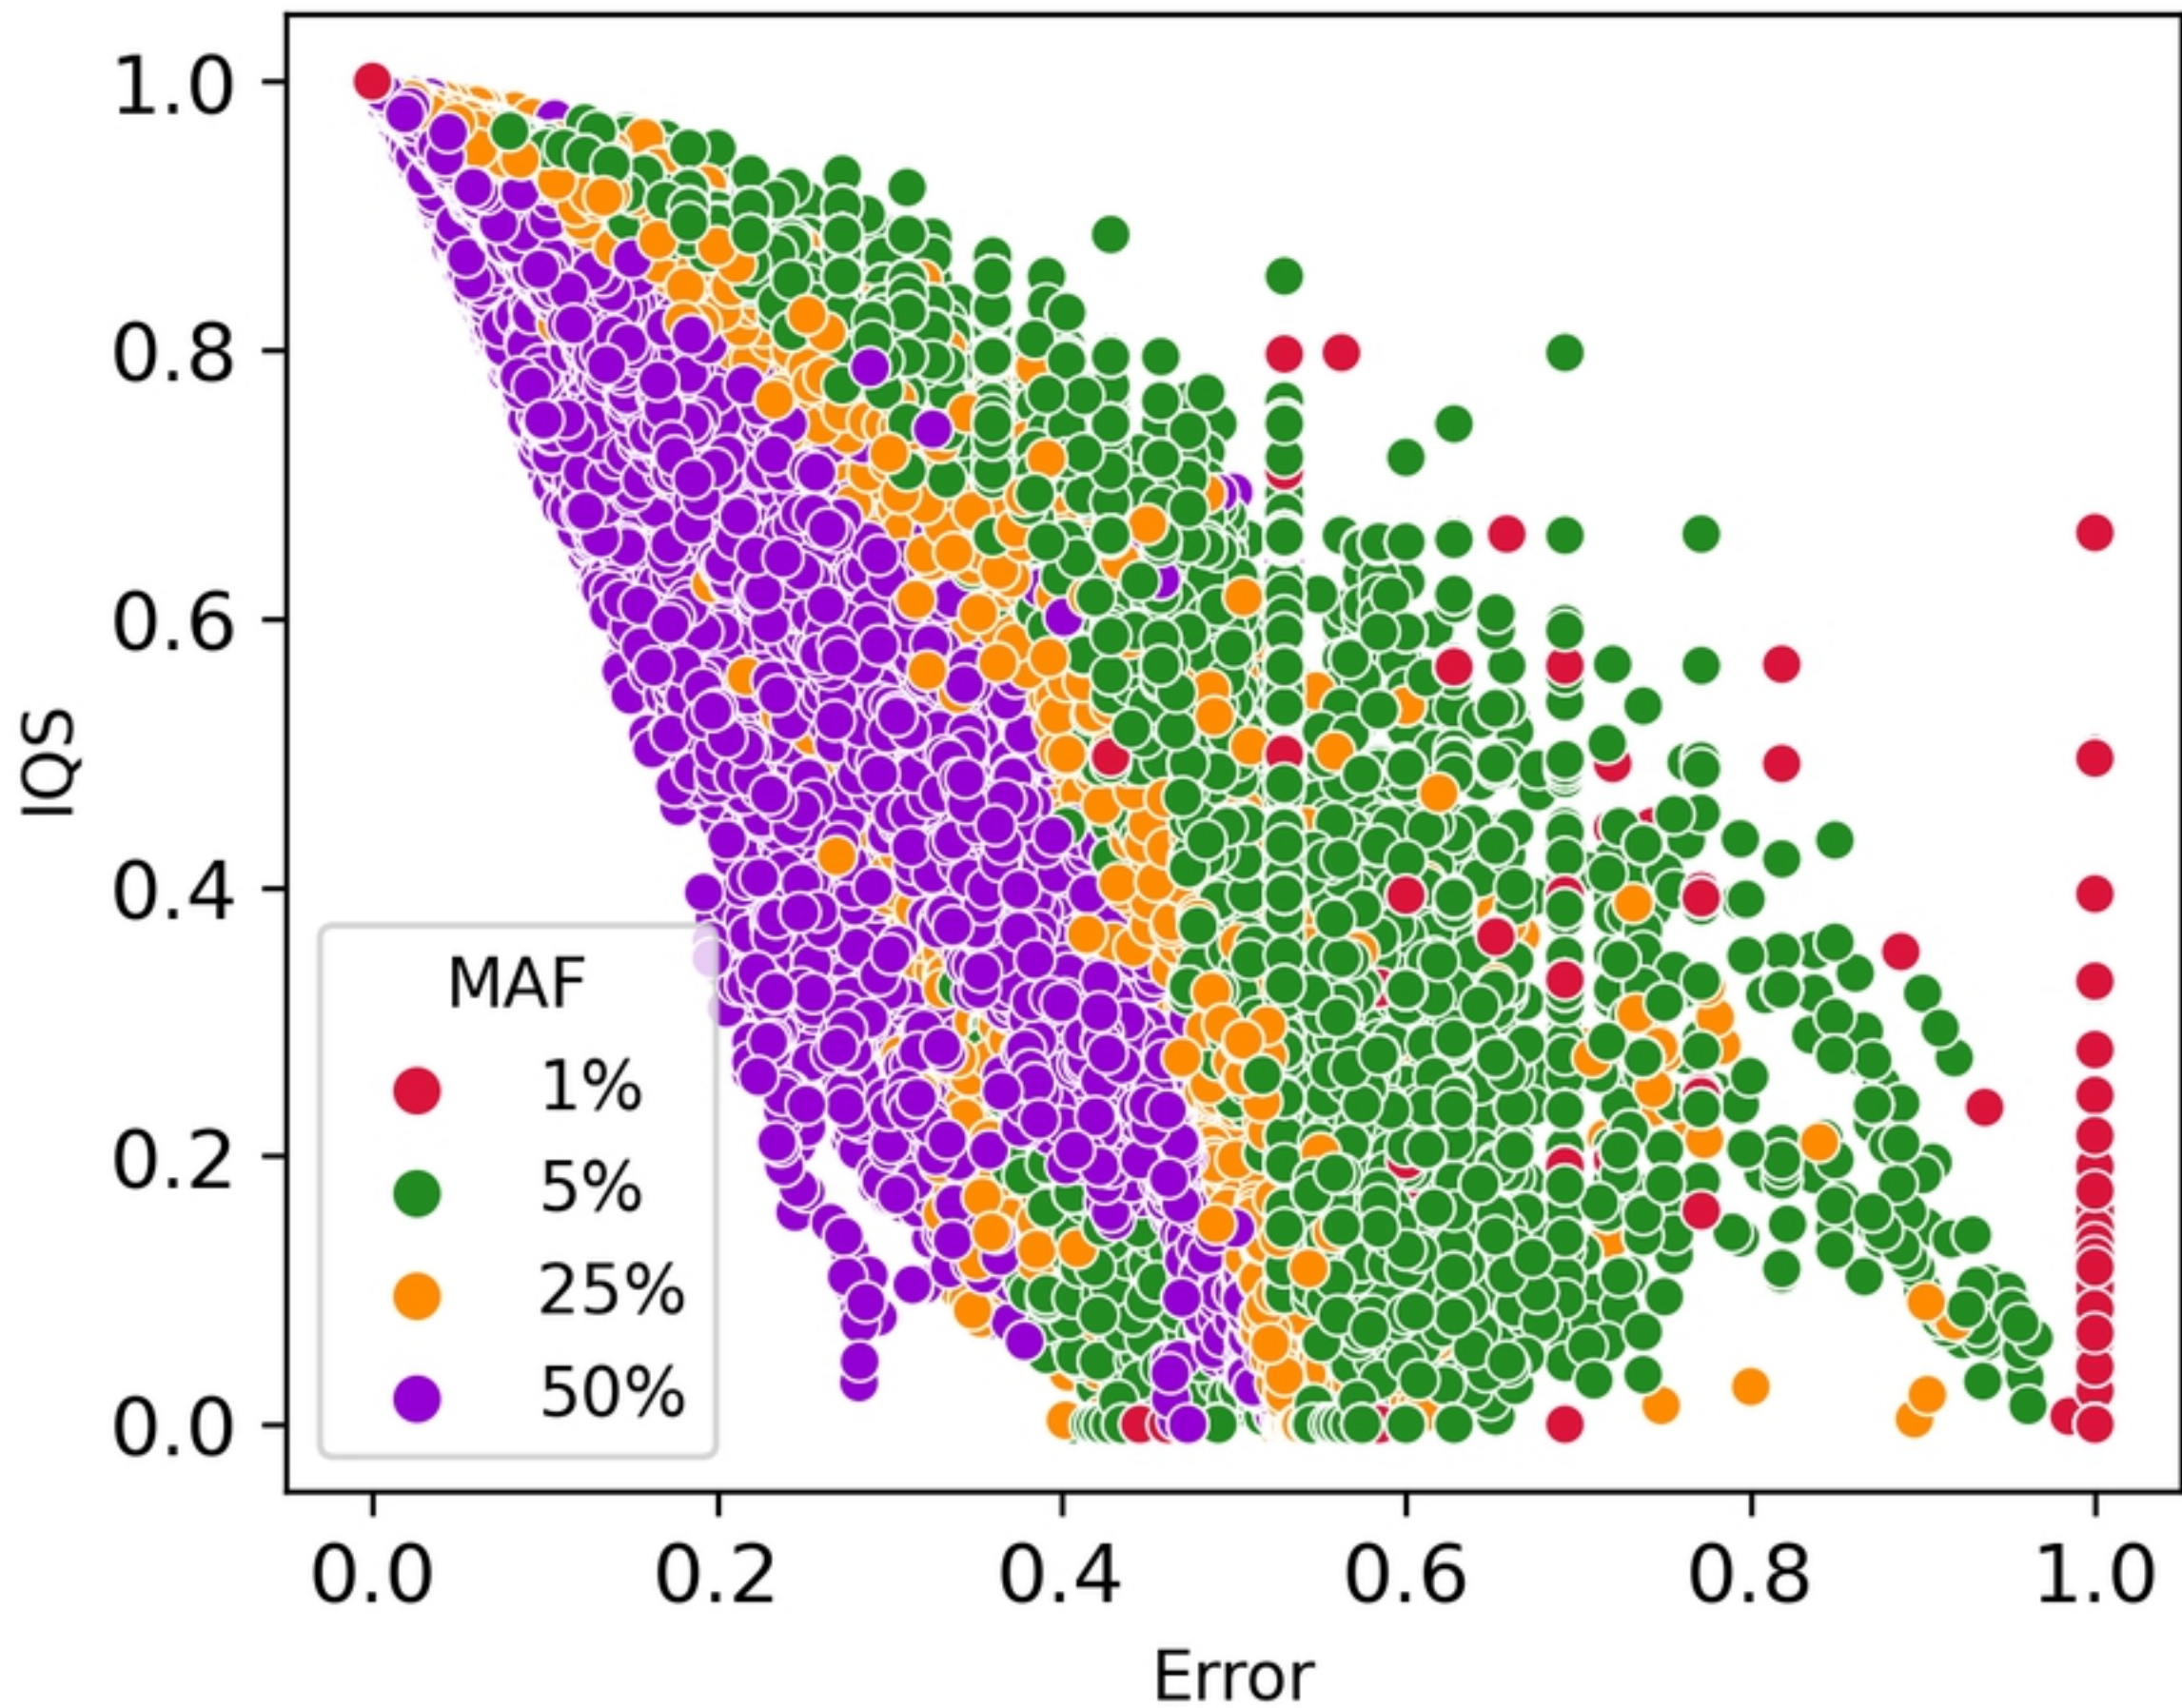

Figure 9



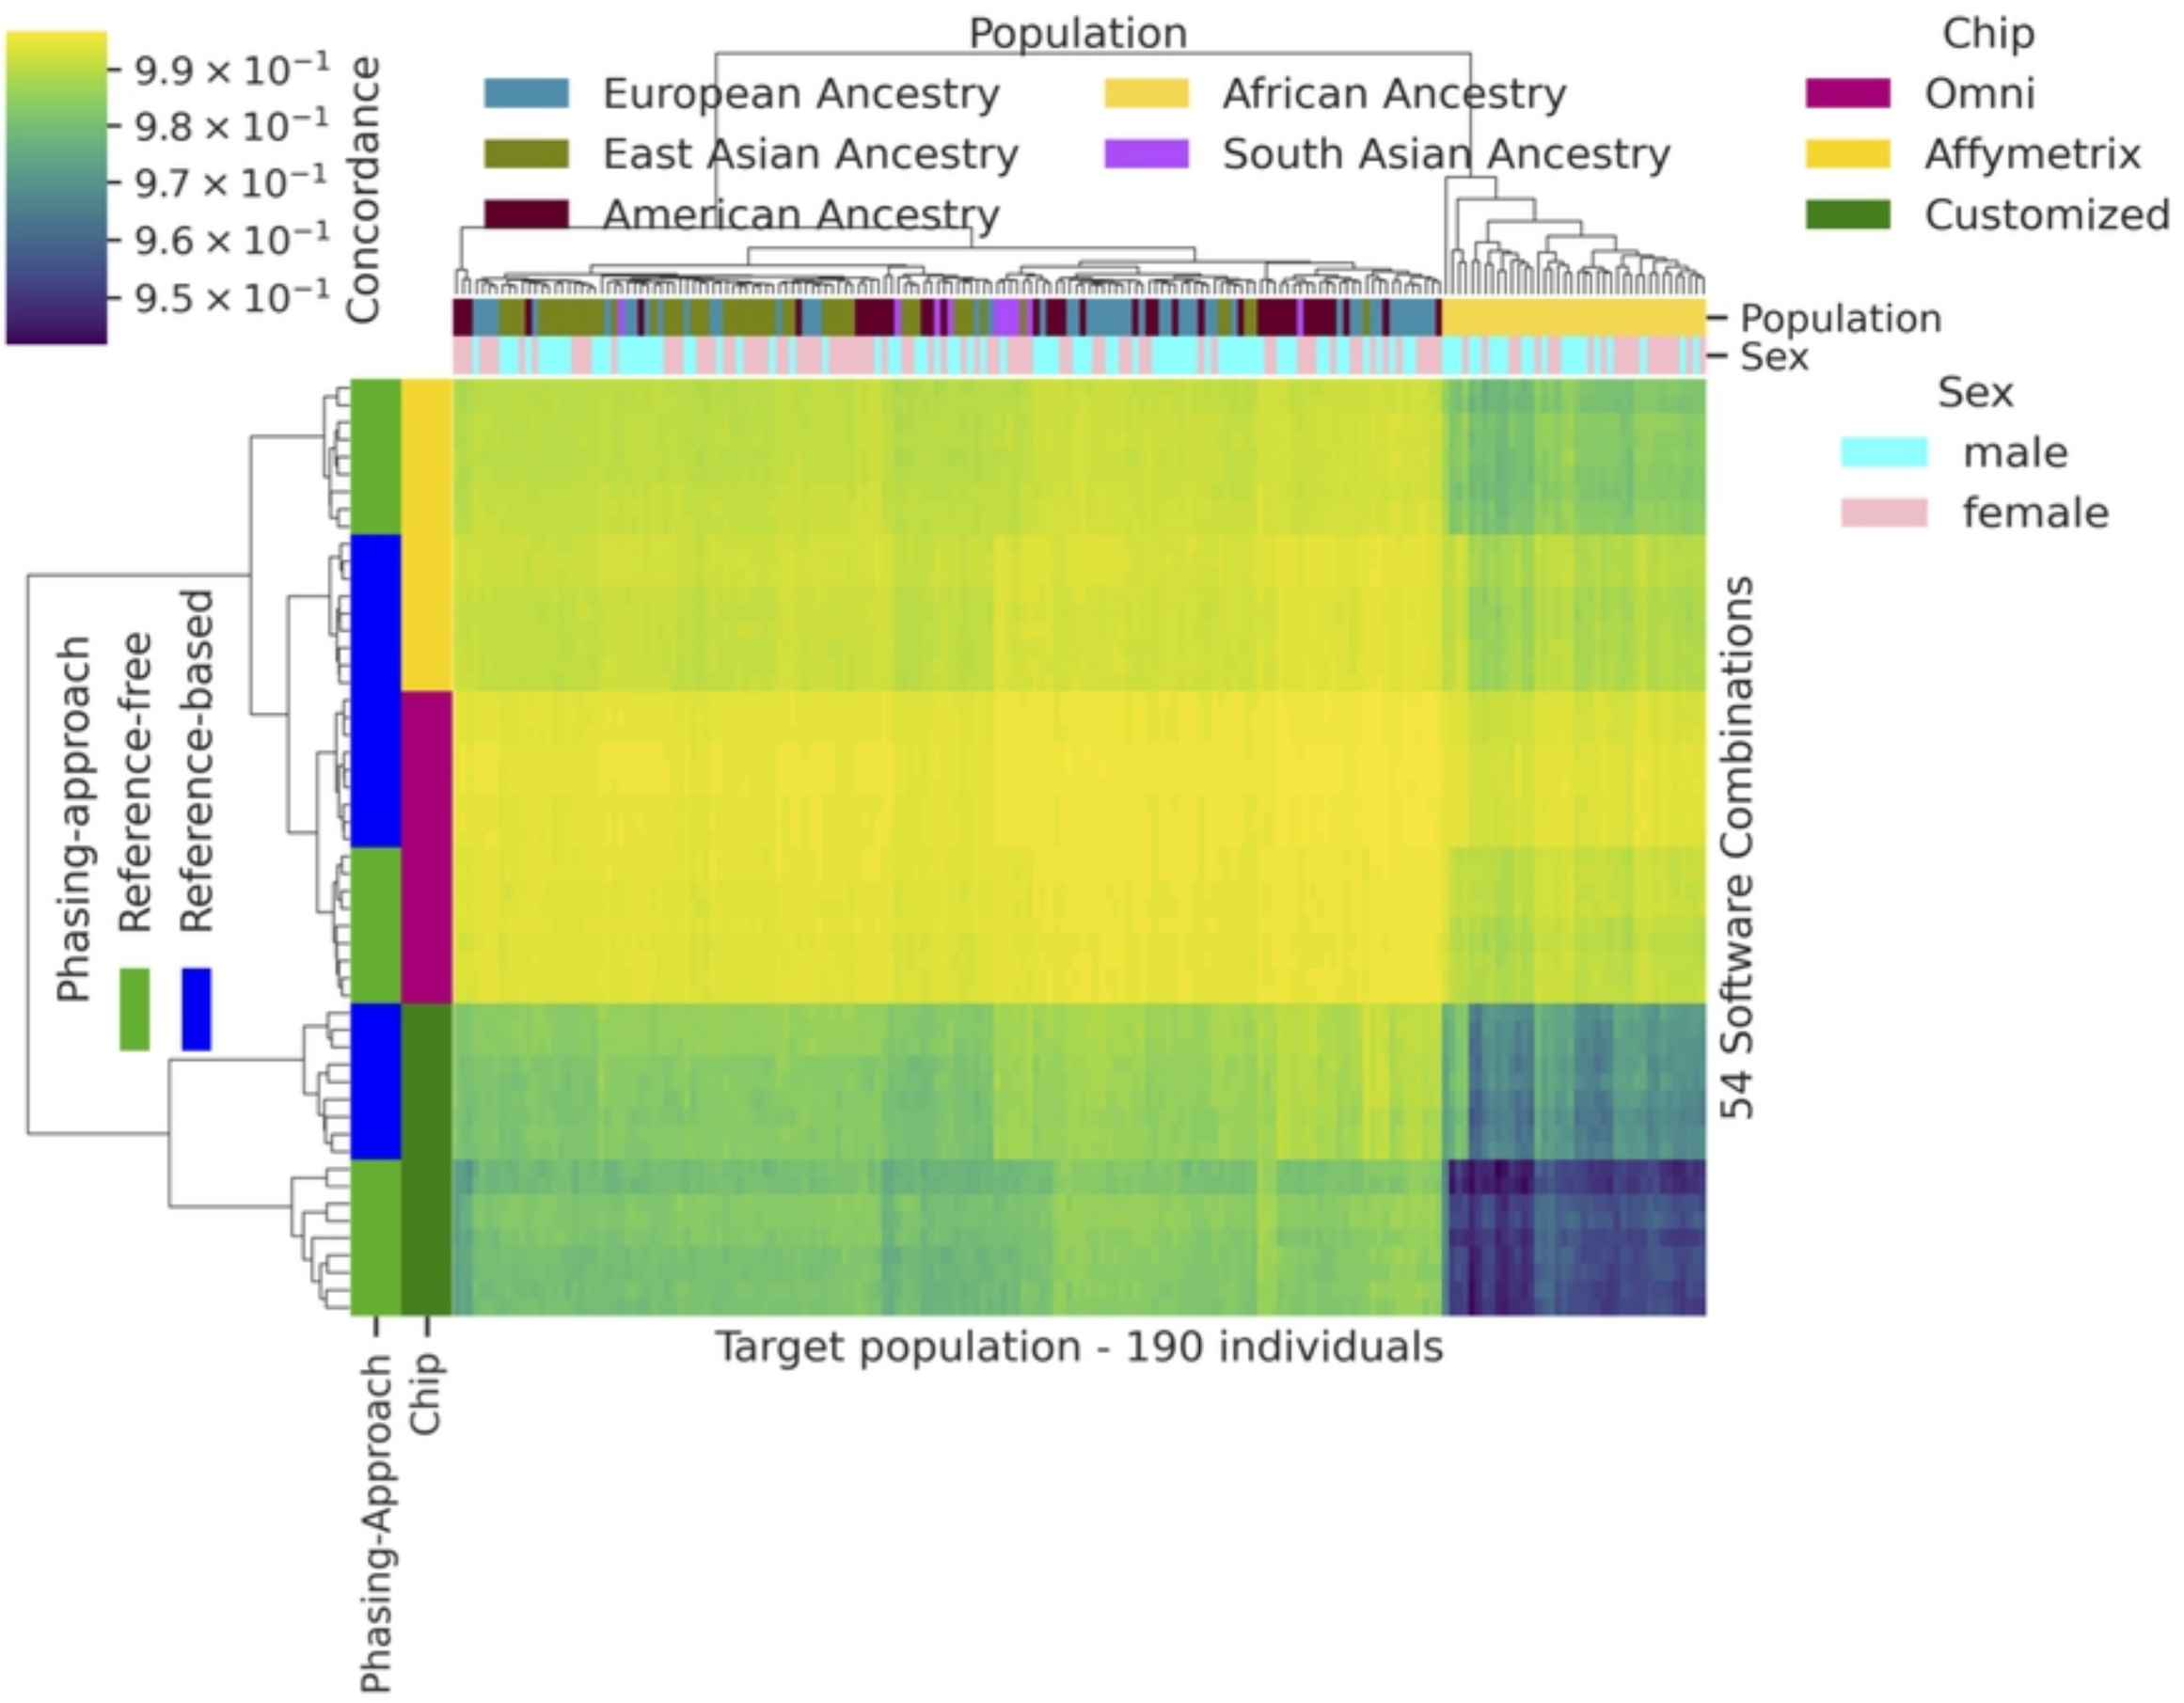

Figure 10

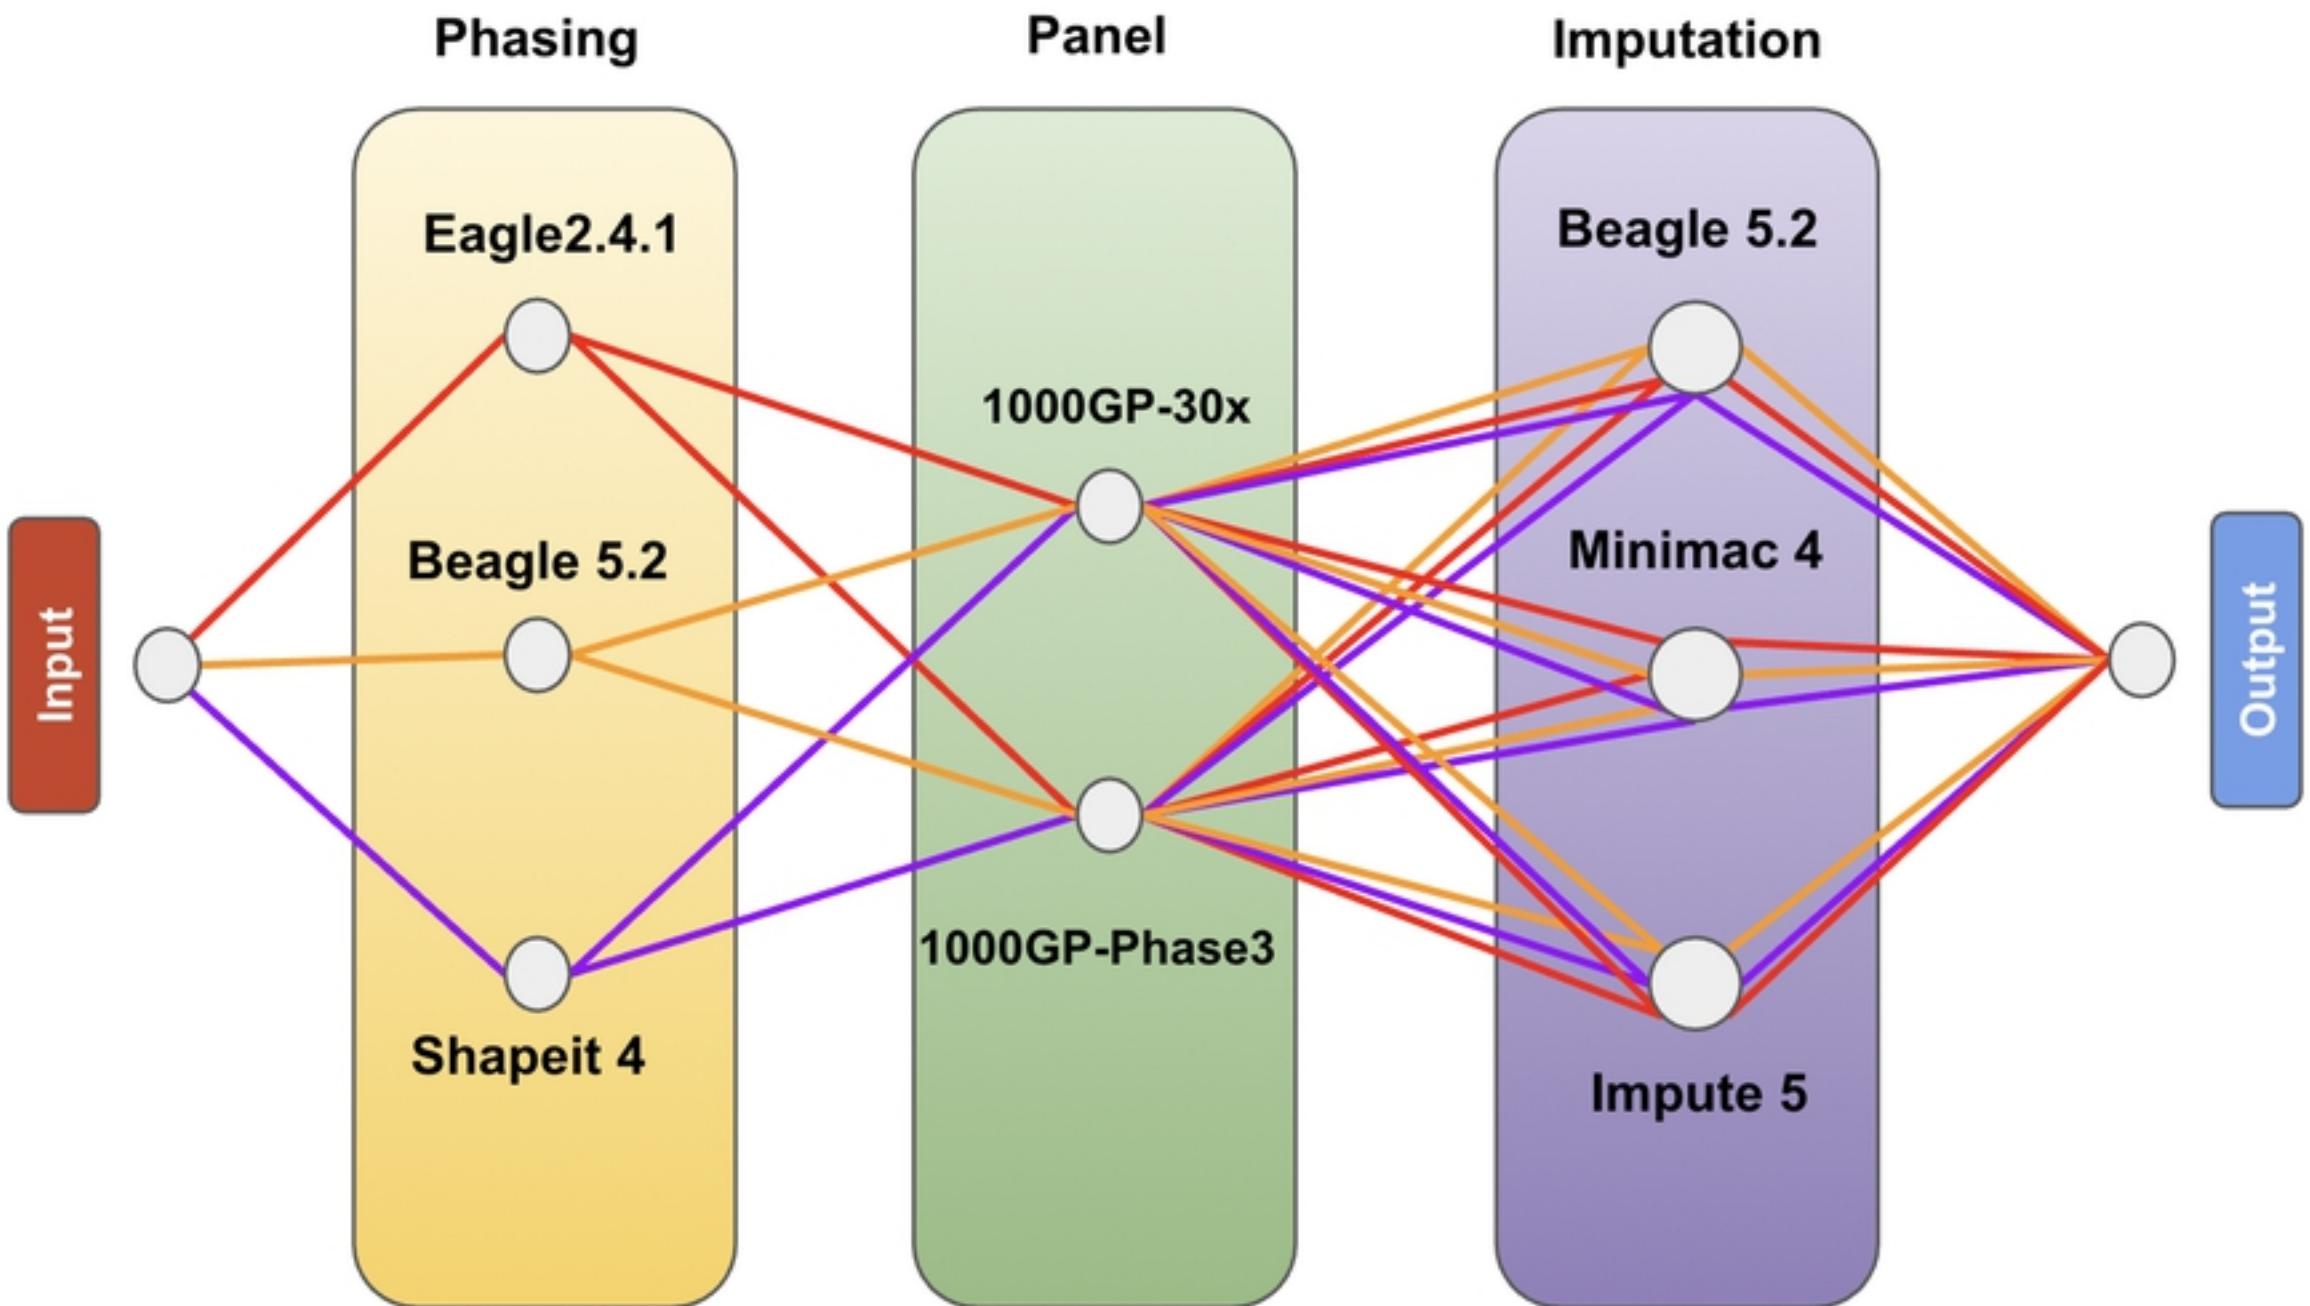

Figure 5

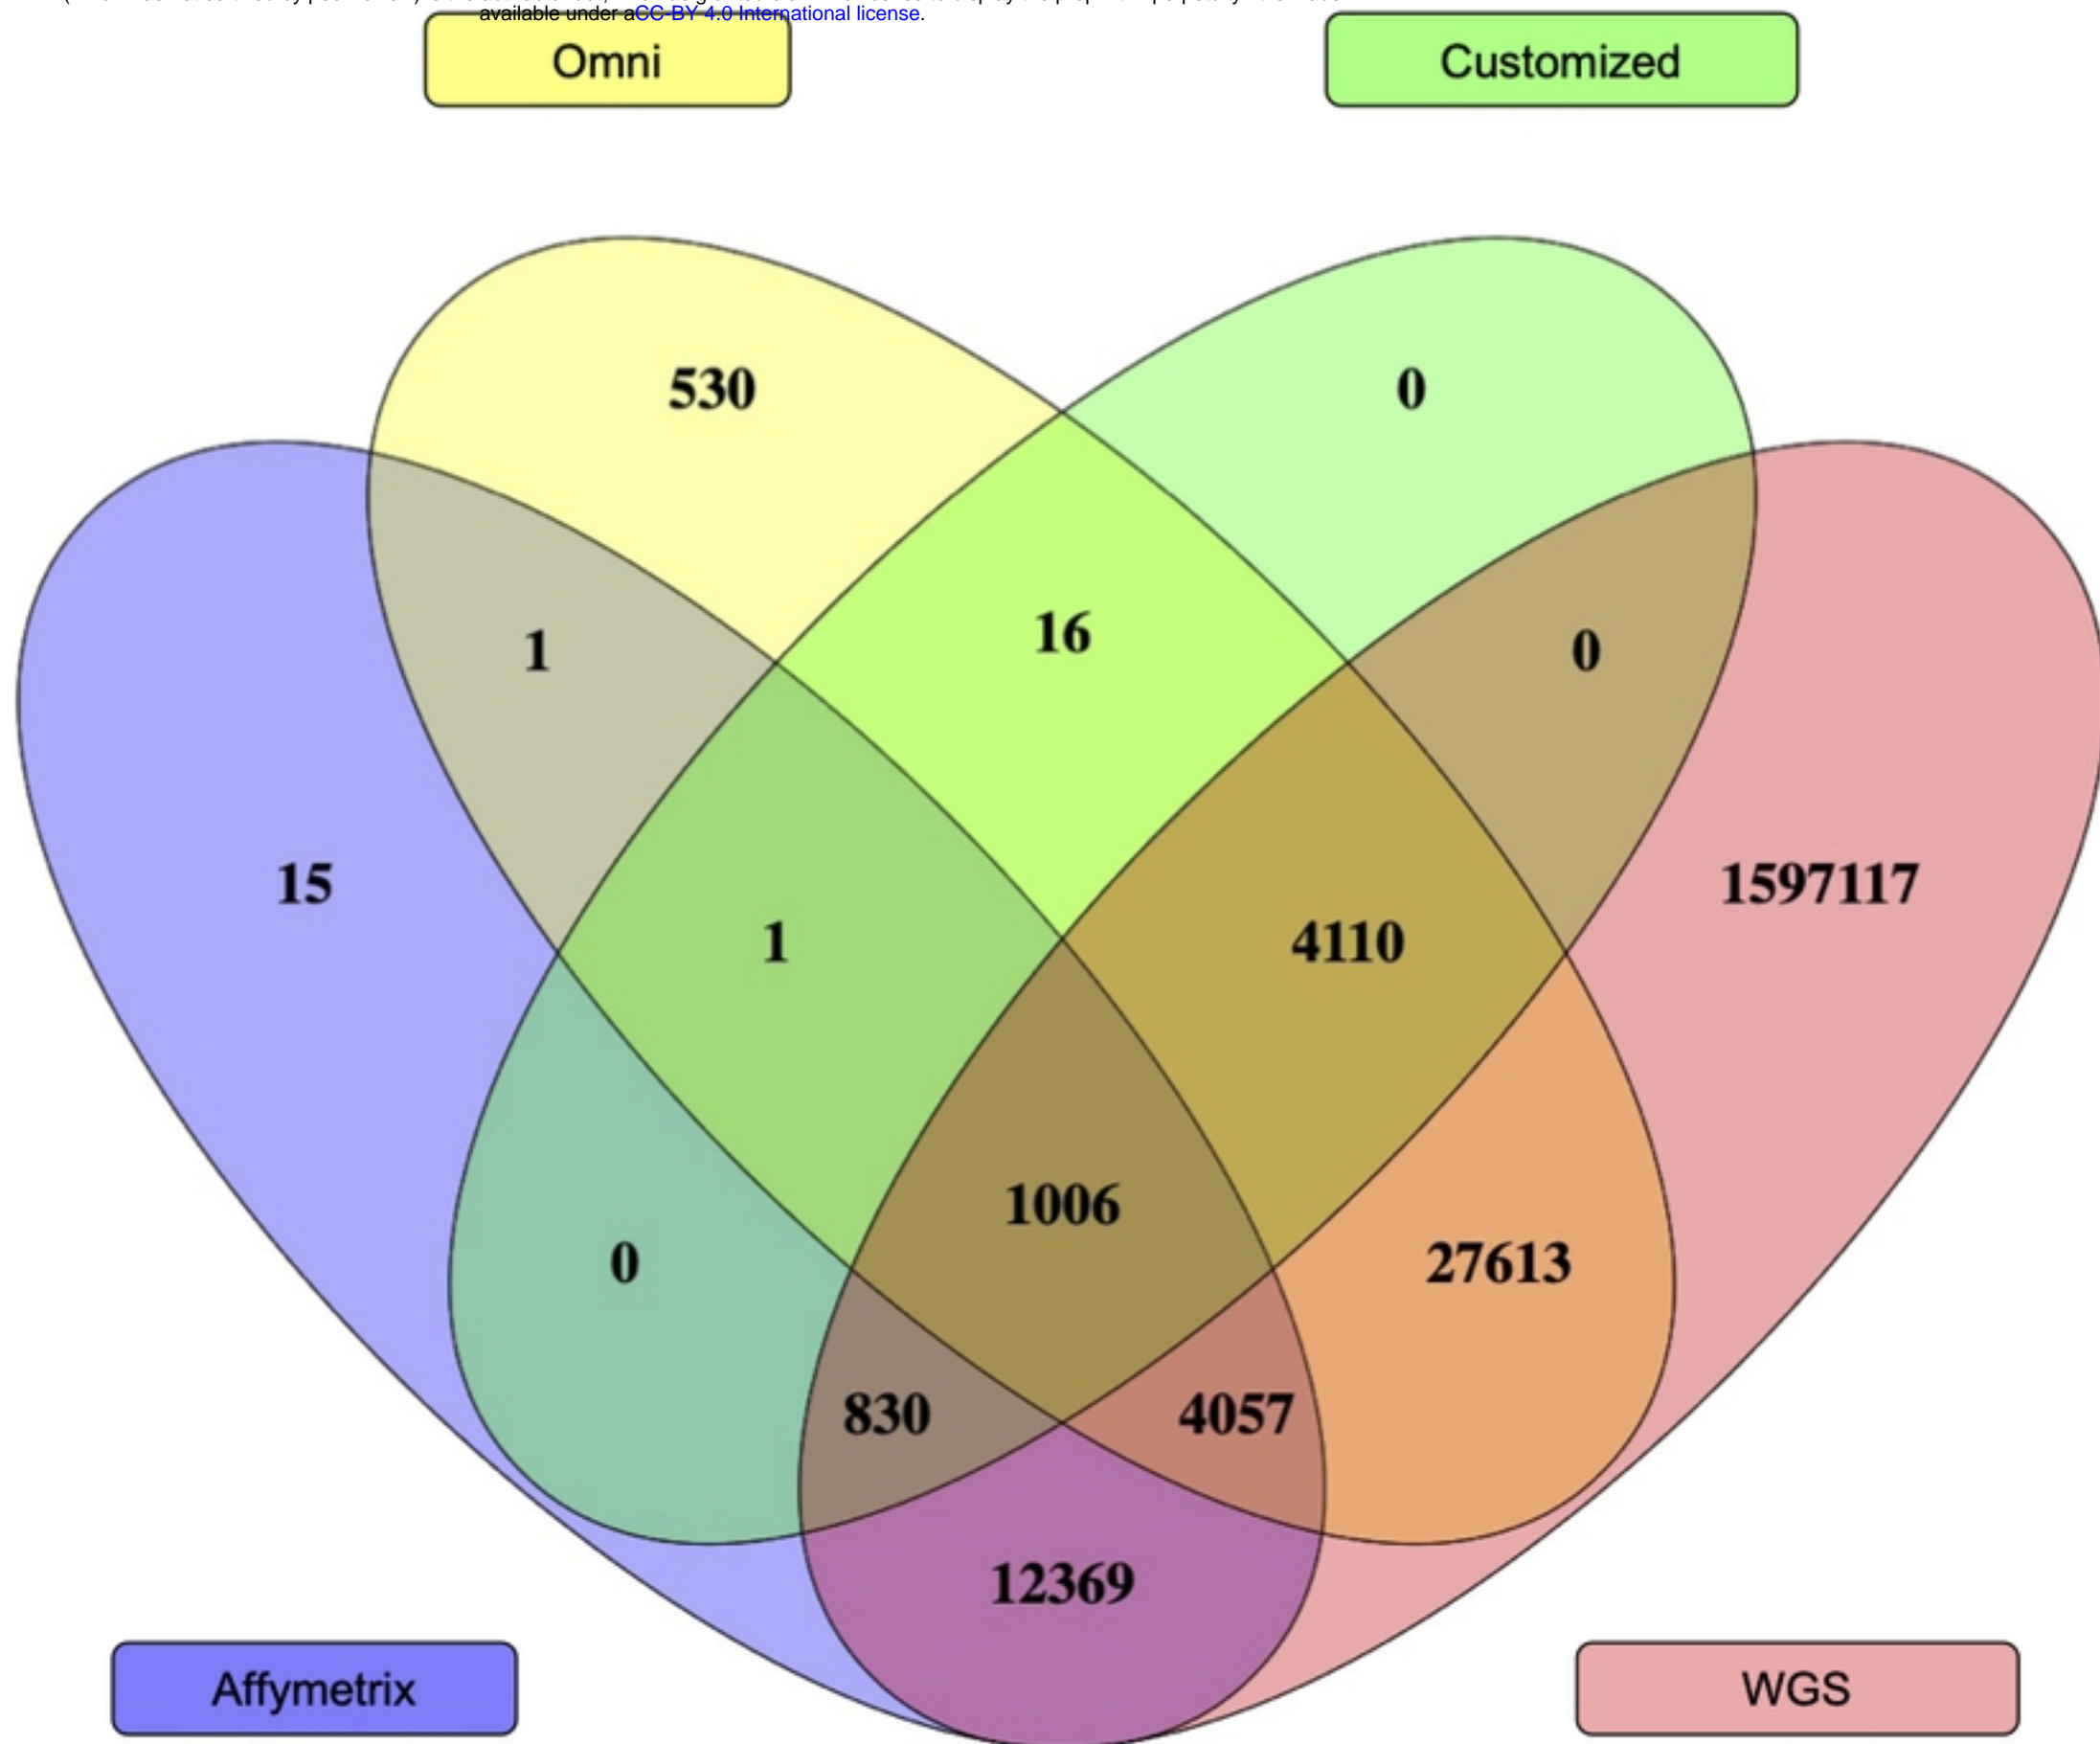

Figure 6



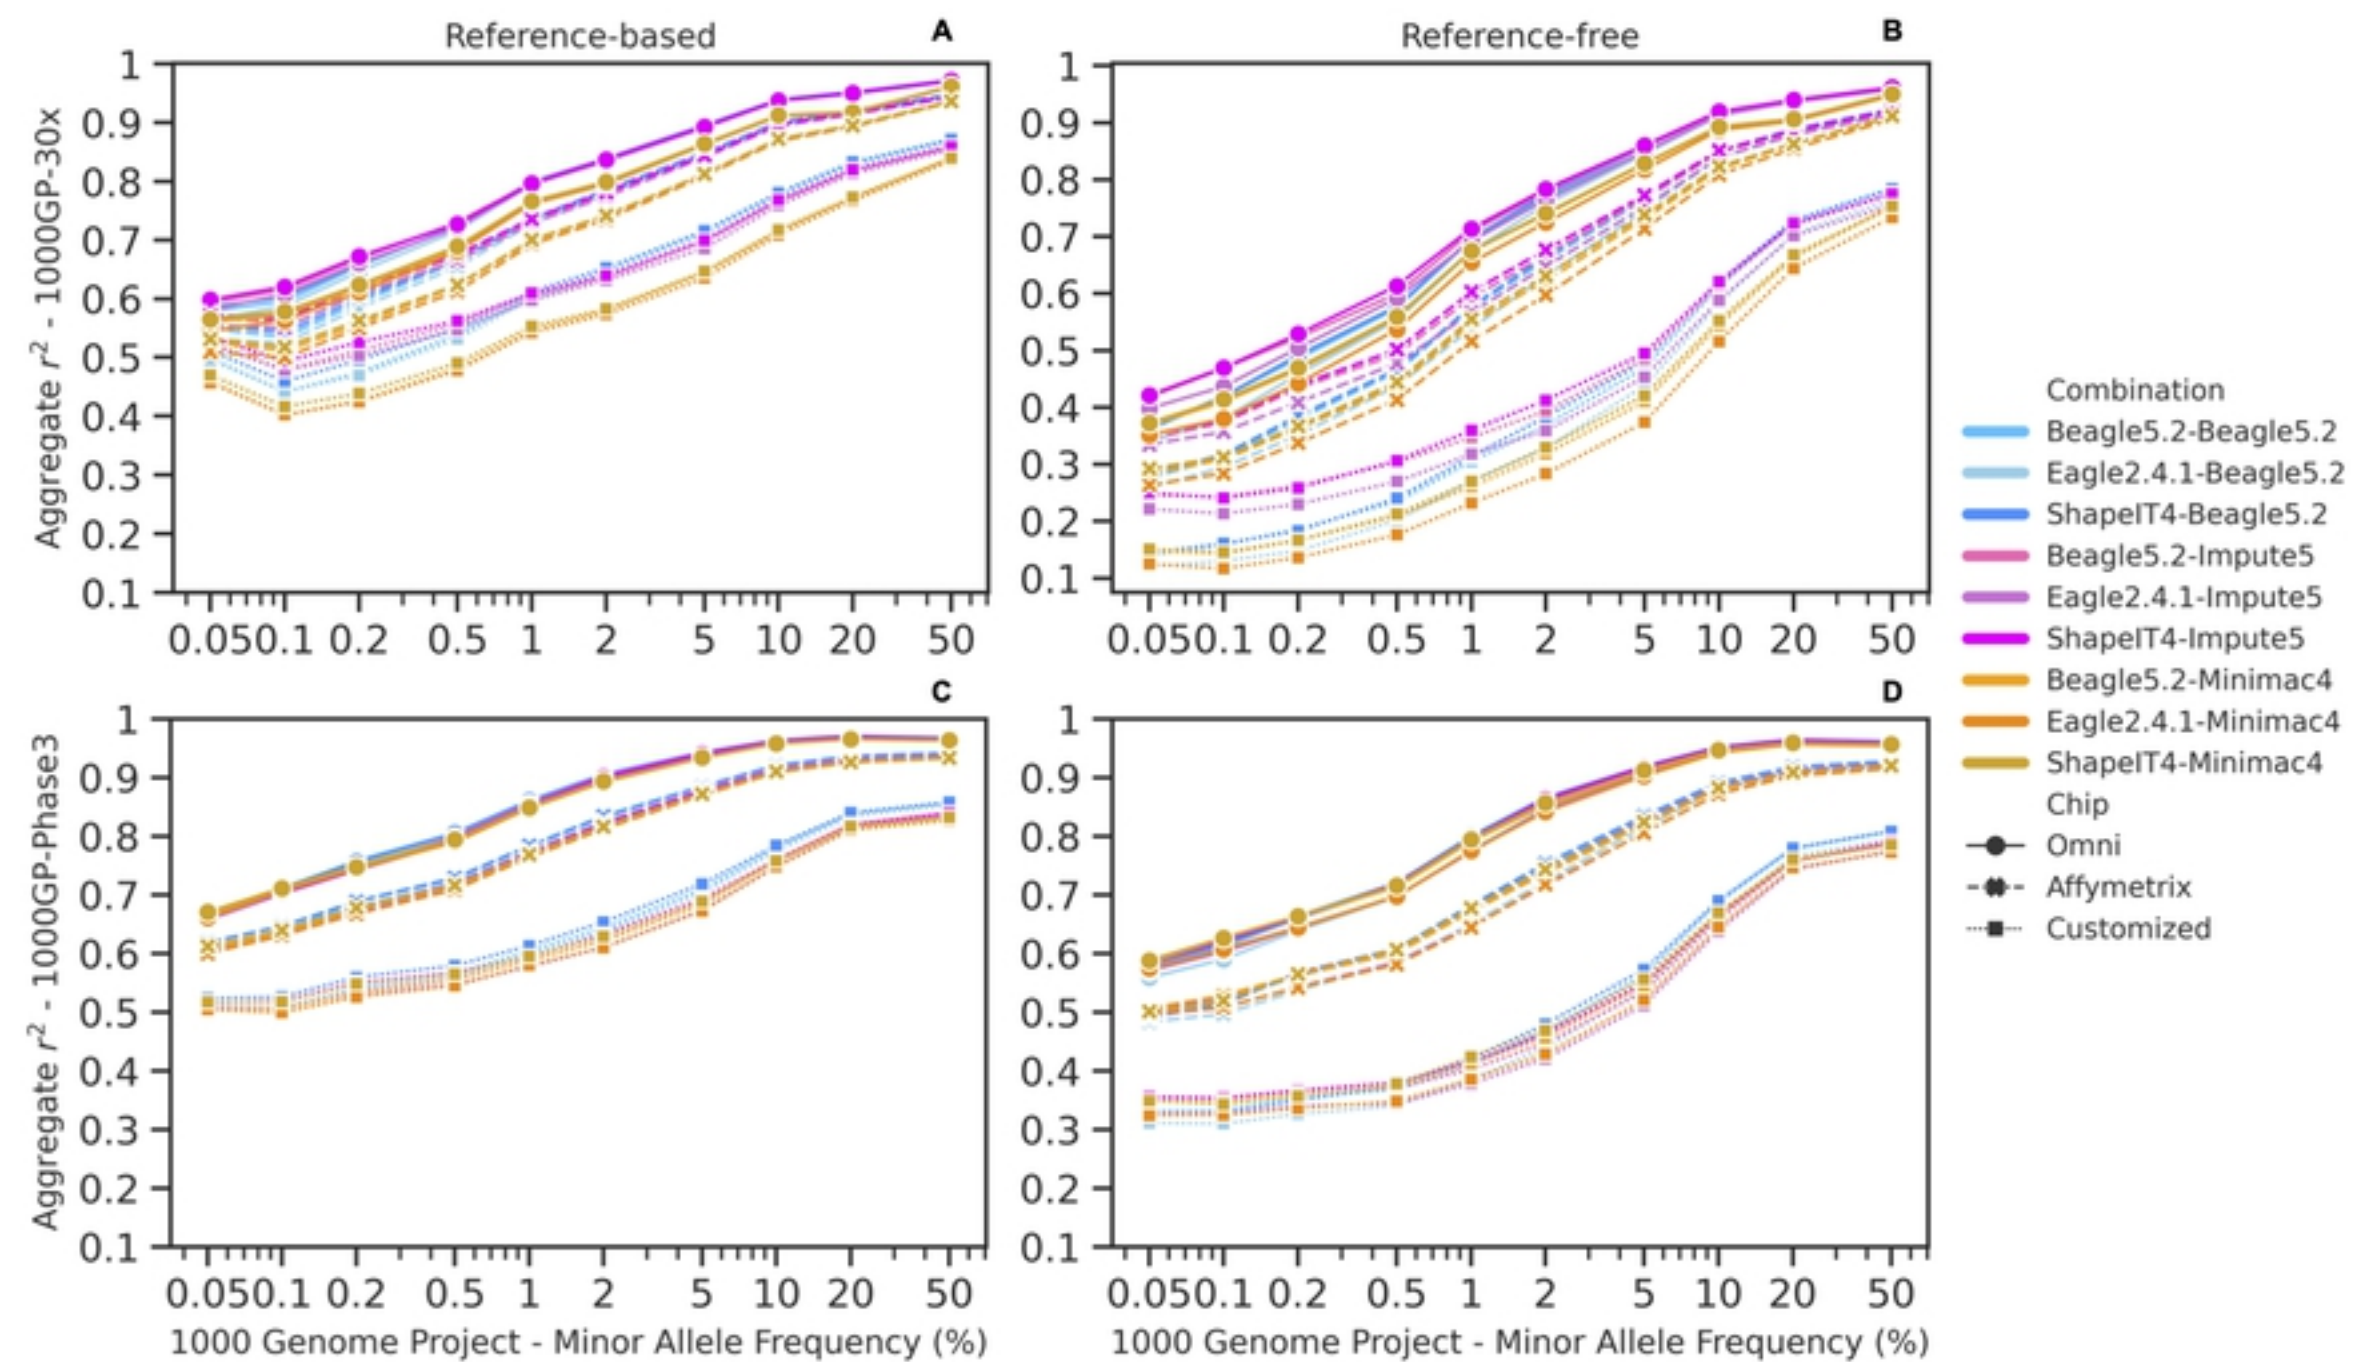

Figure 7

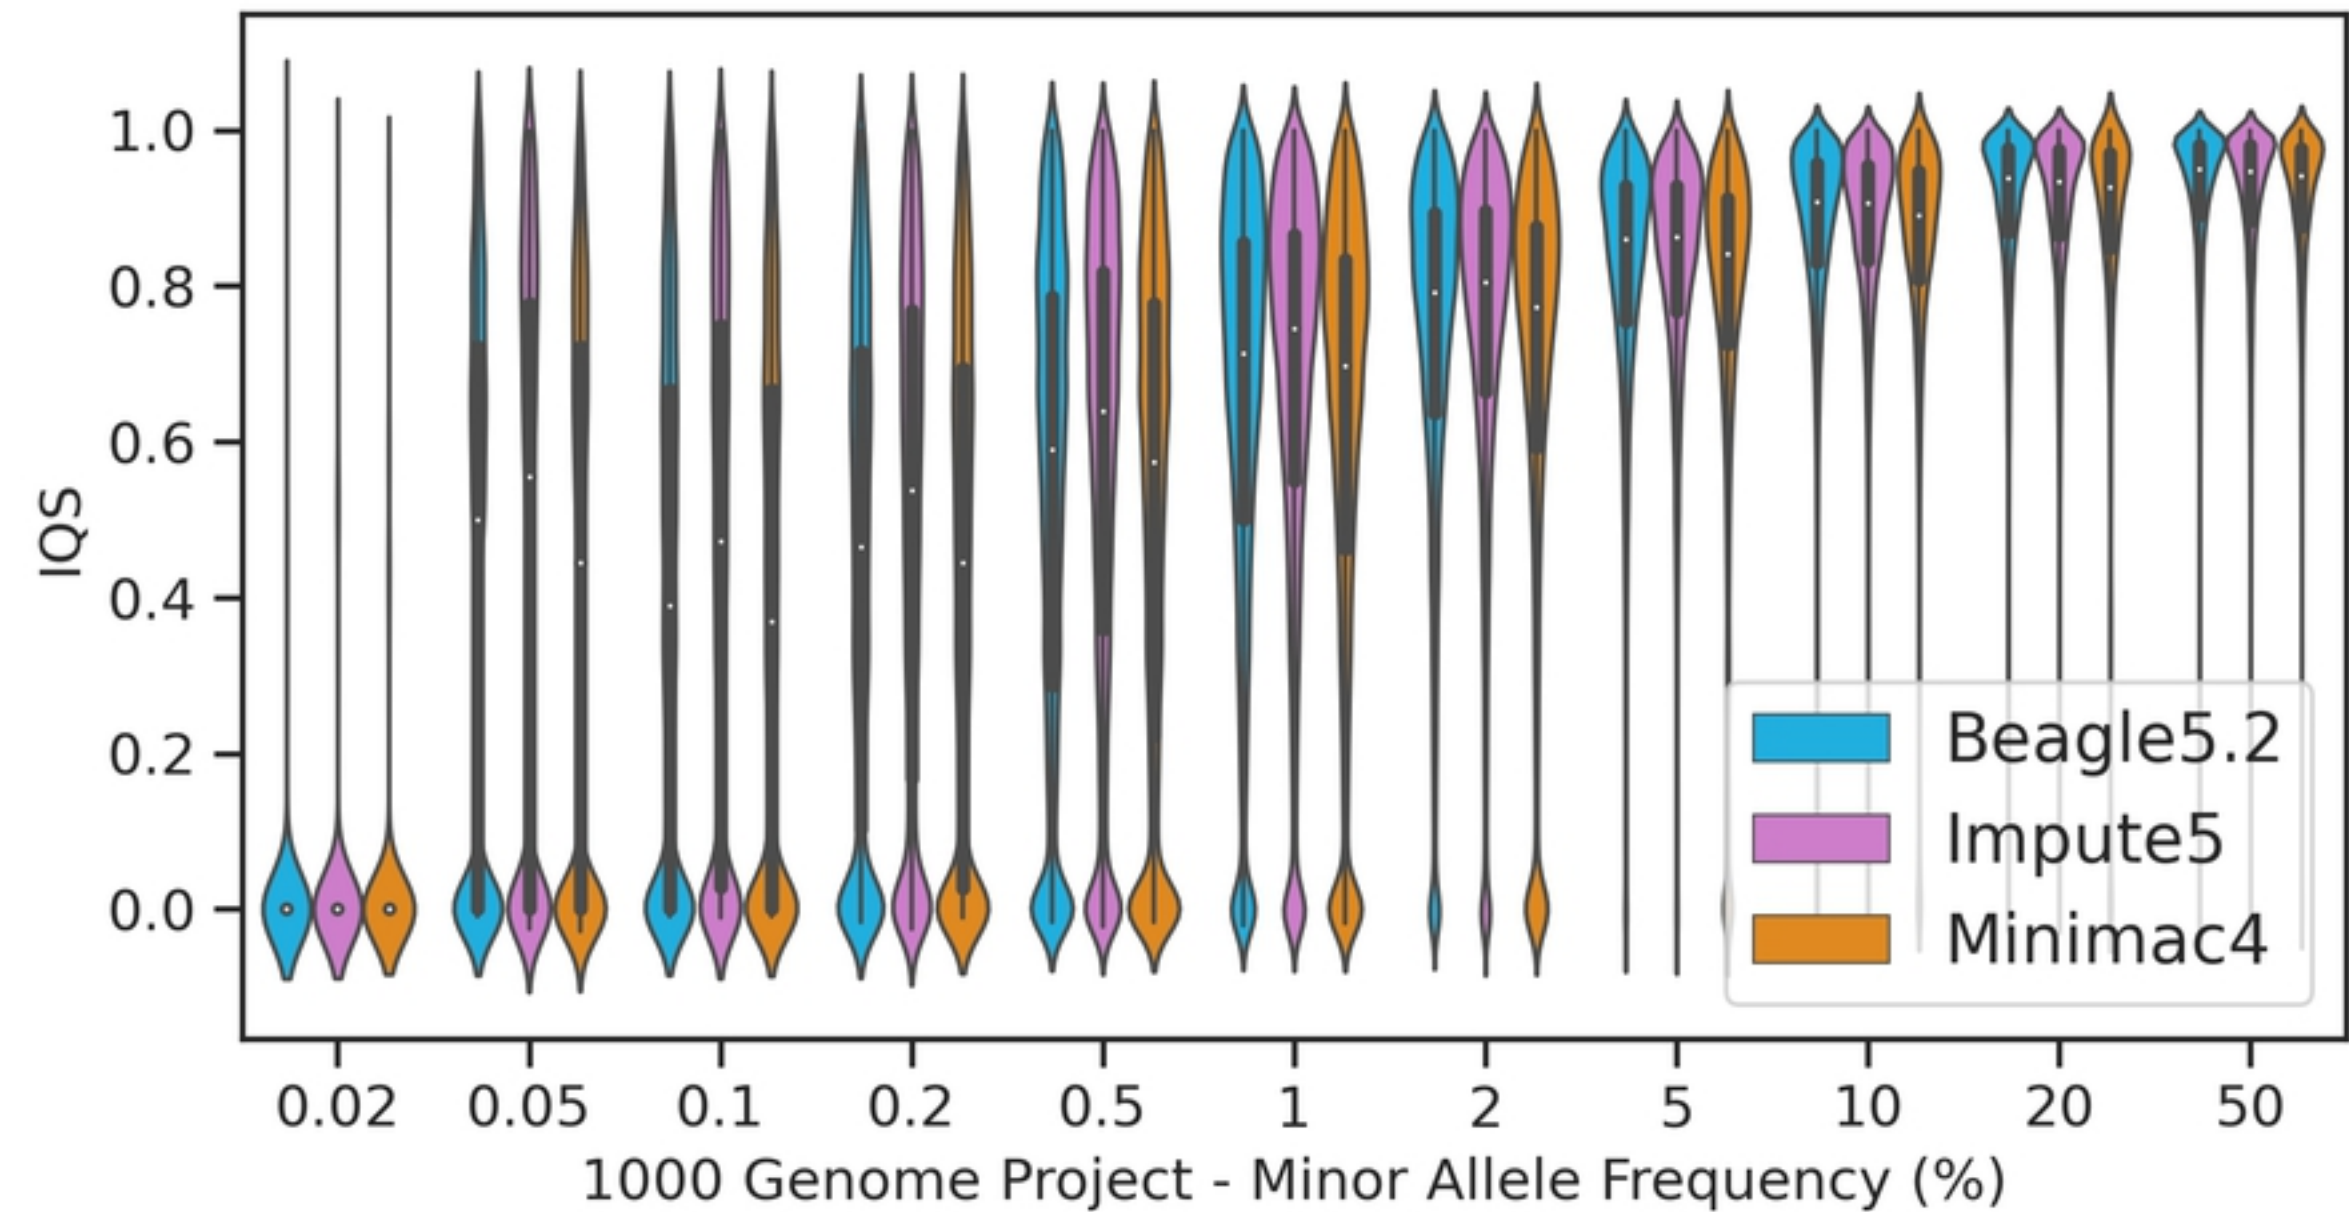

Figure 8

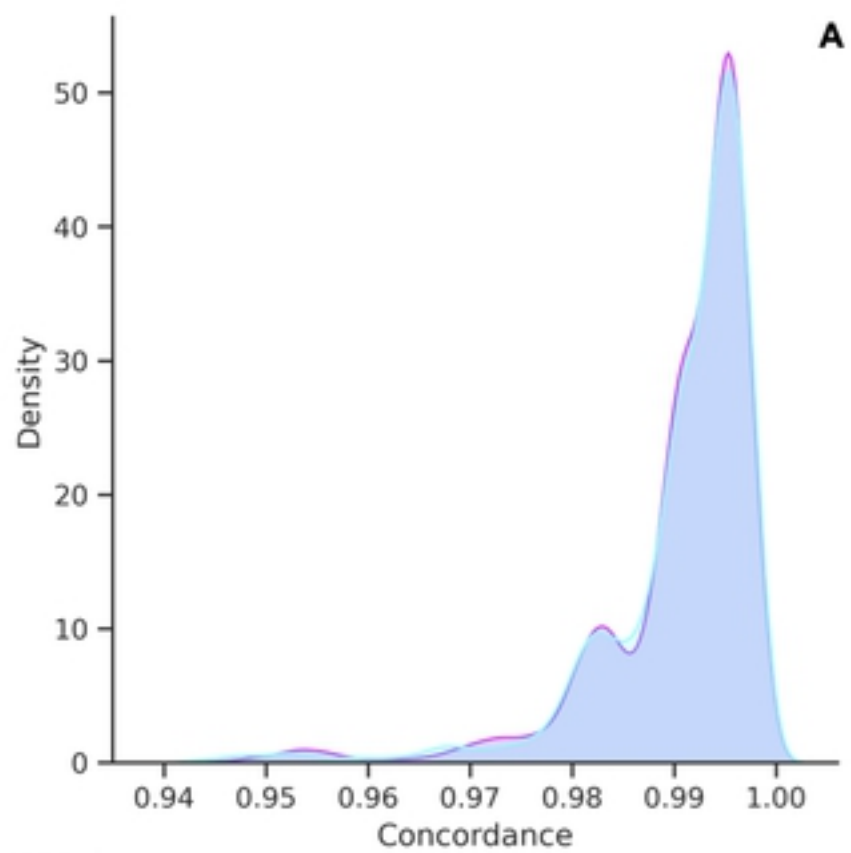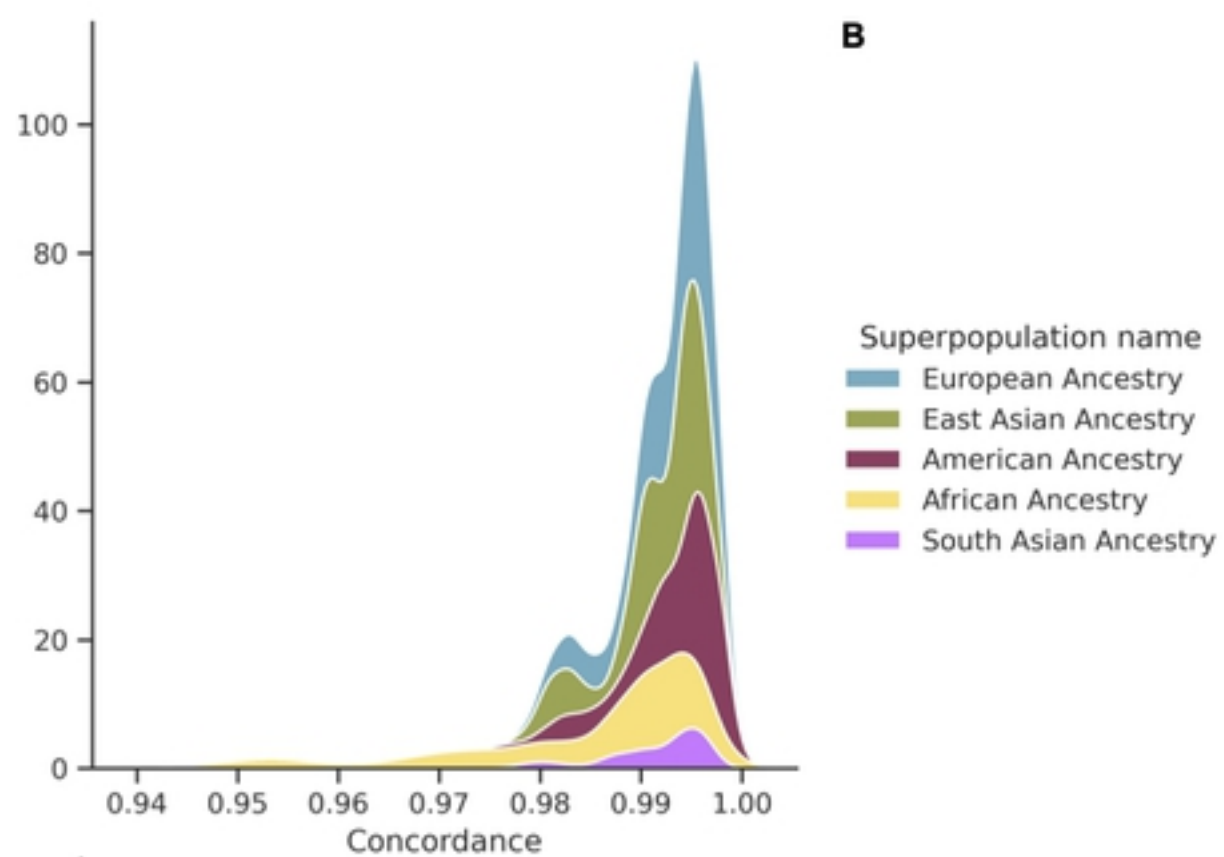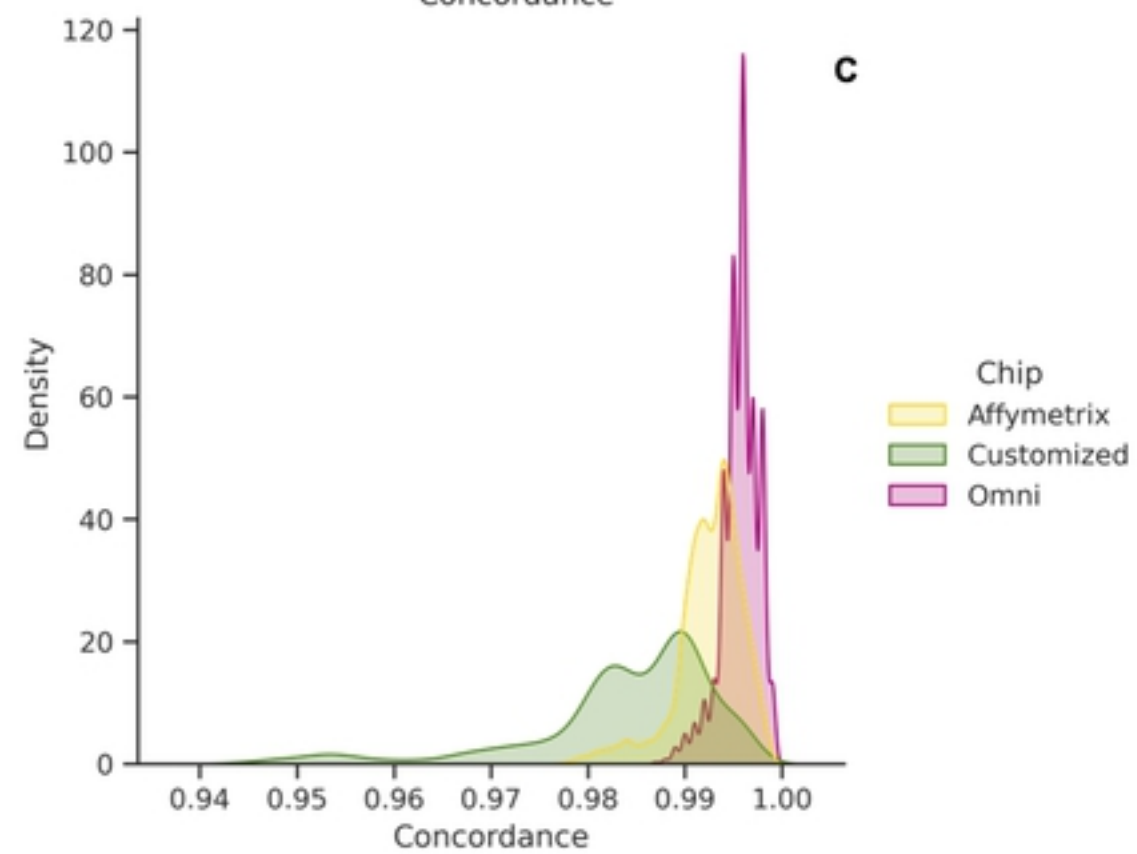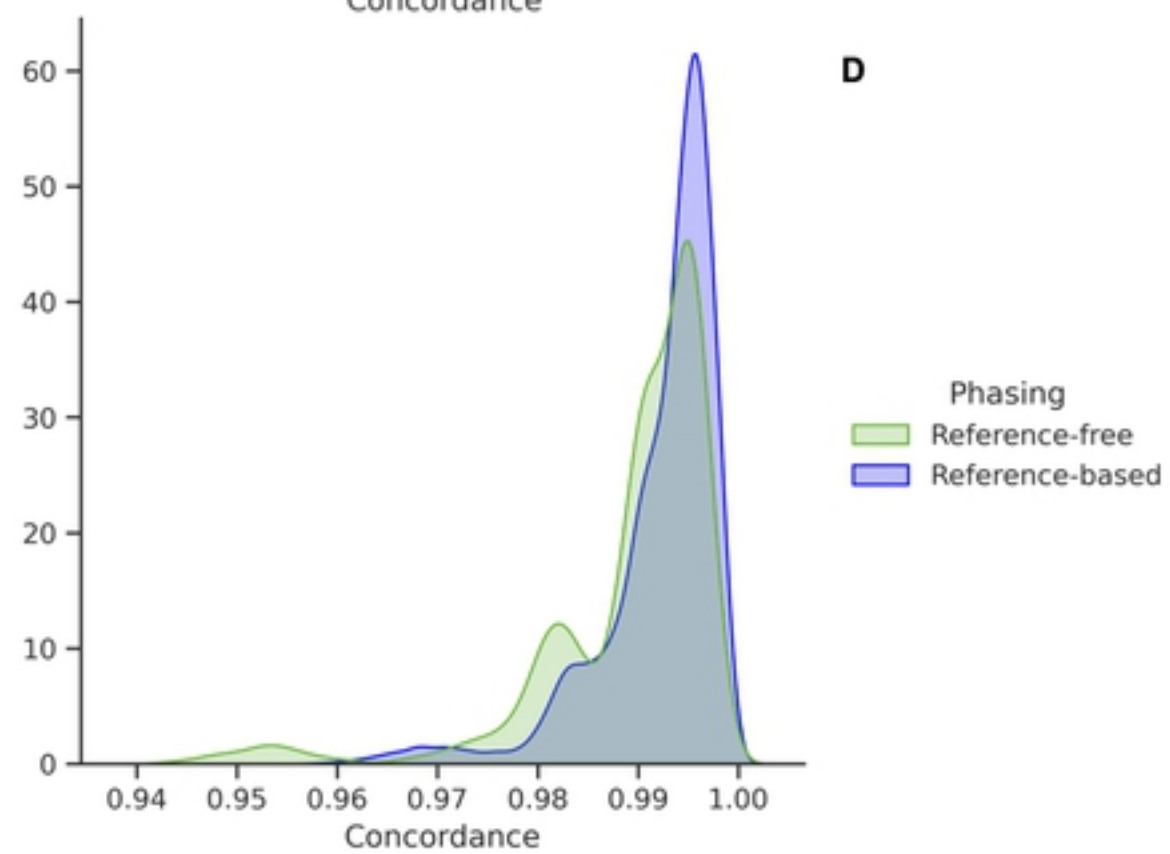

Figure 11



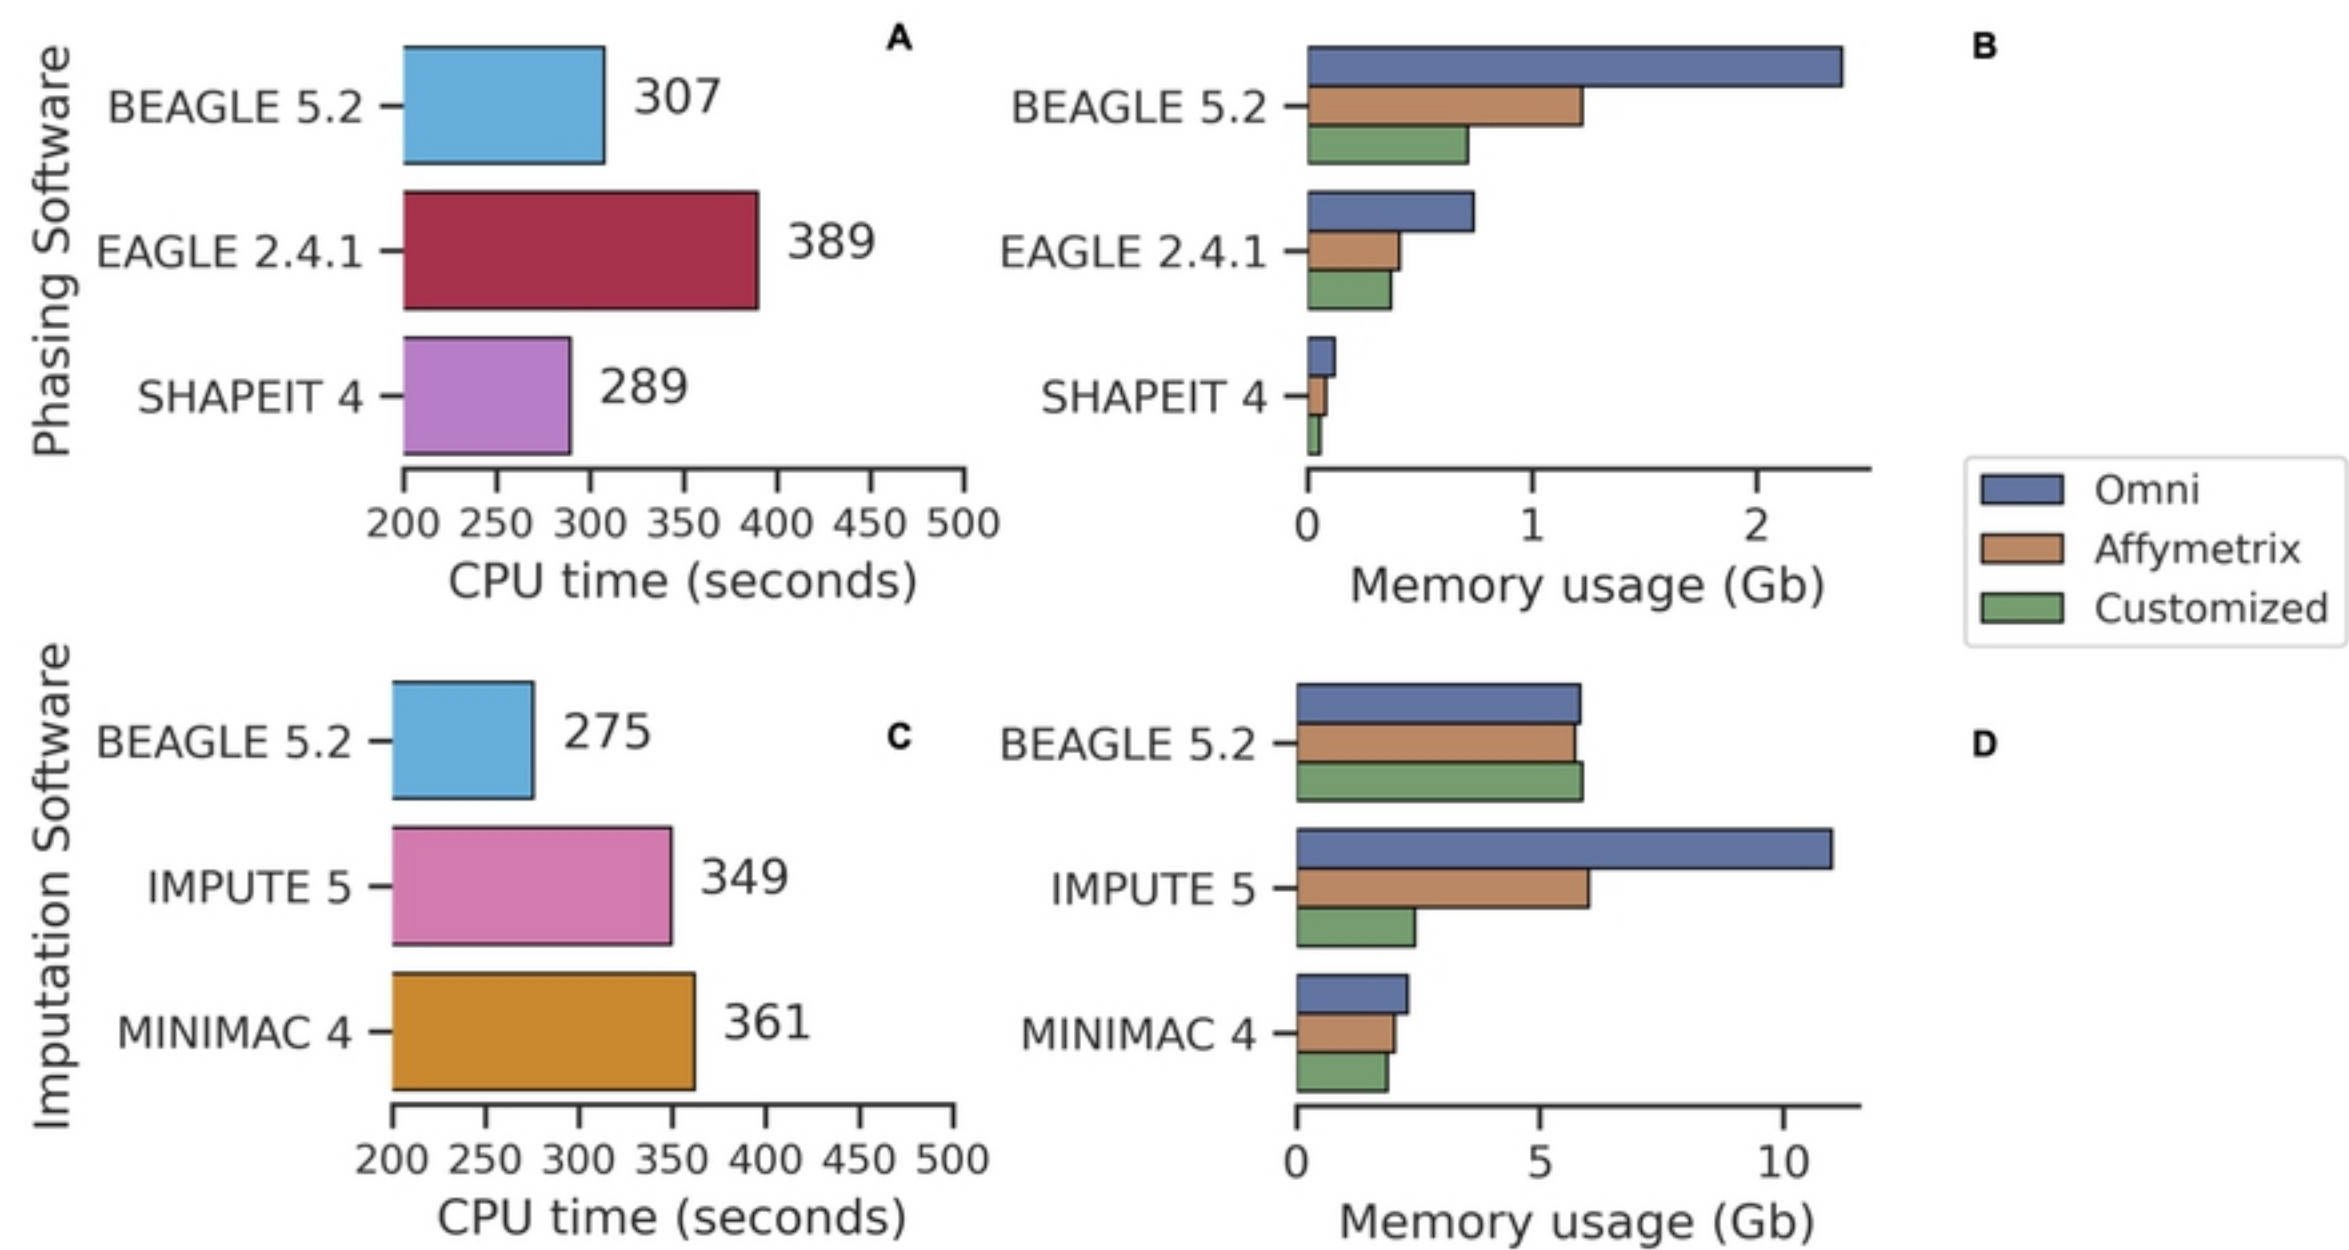

Figure 12

Pha-Imp Combinations

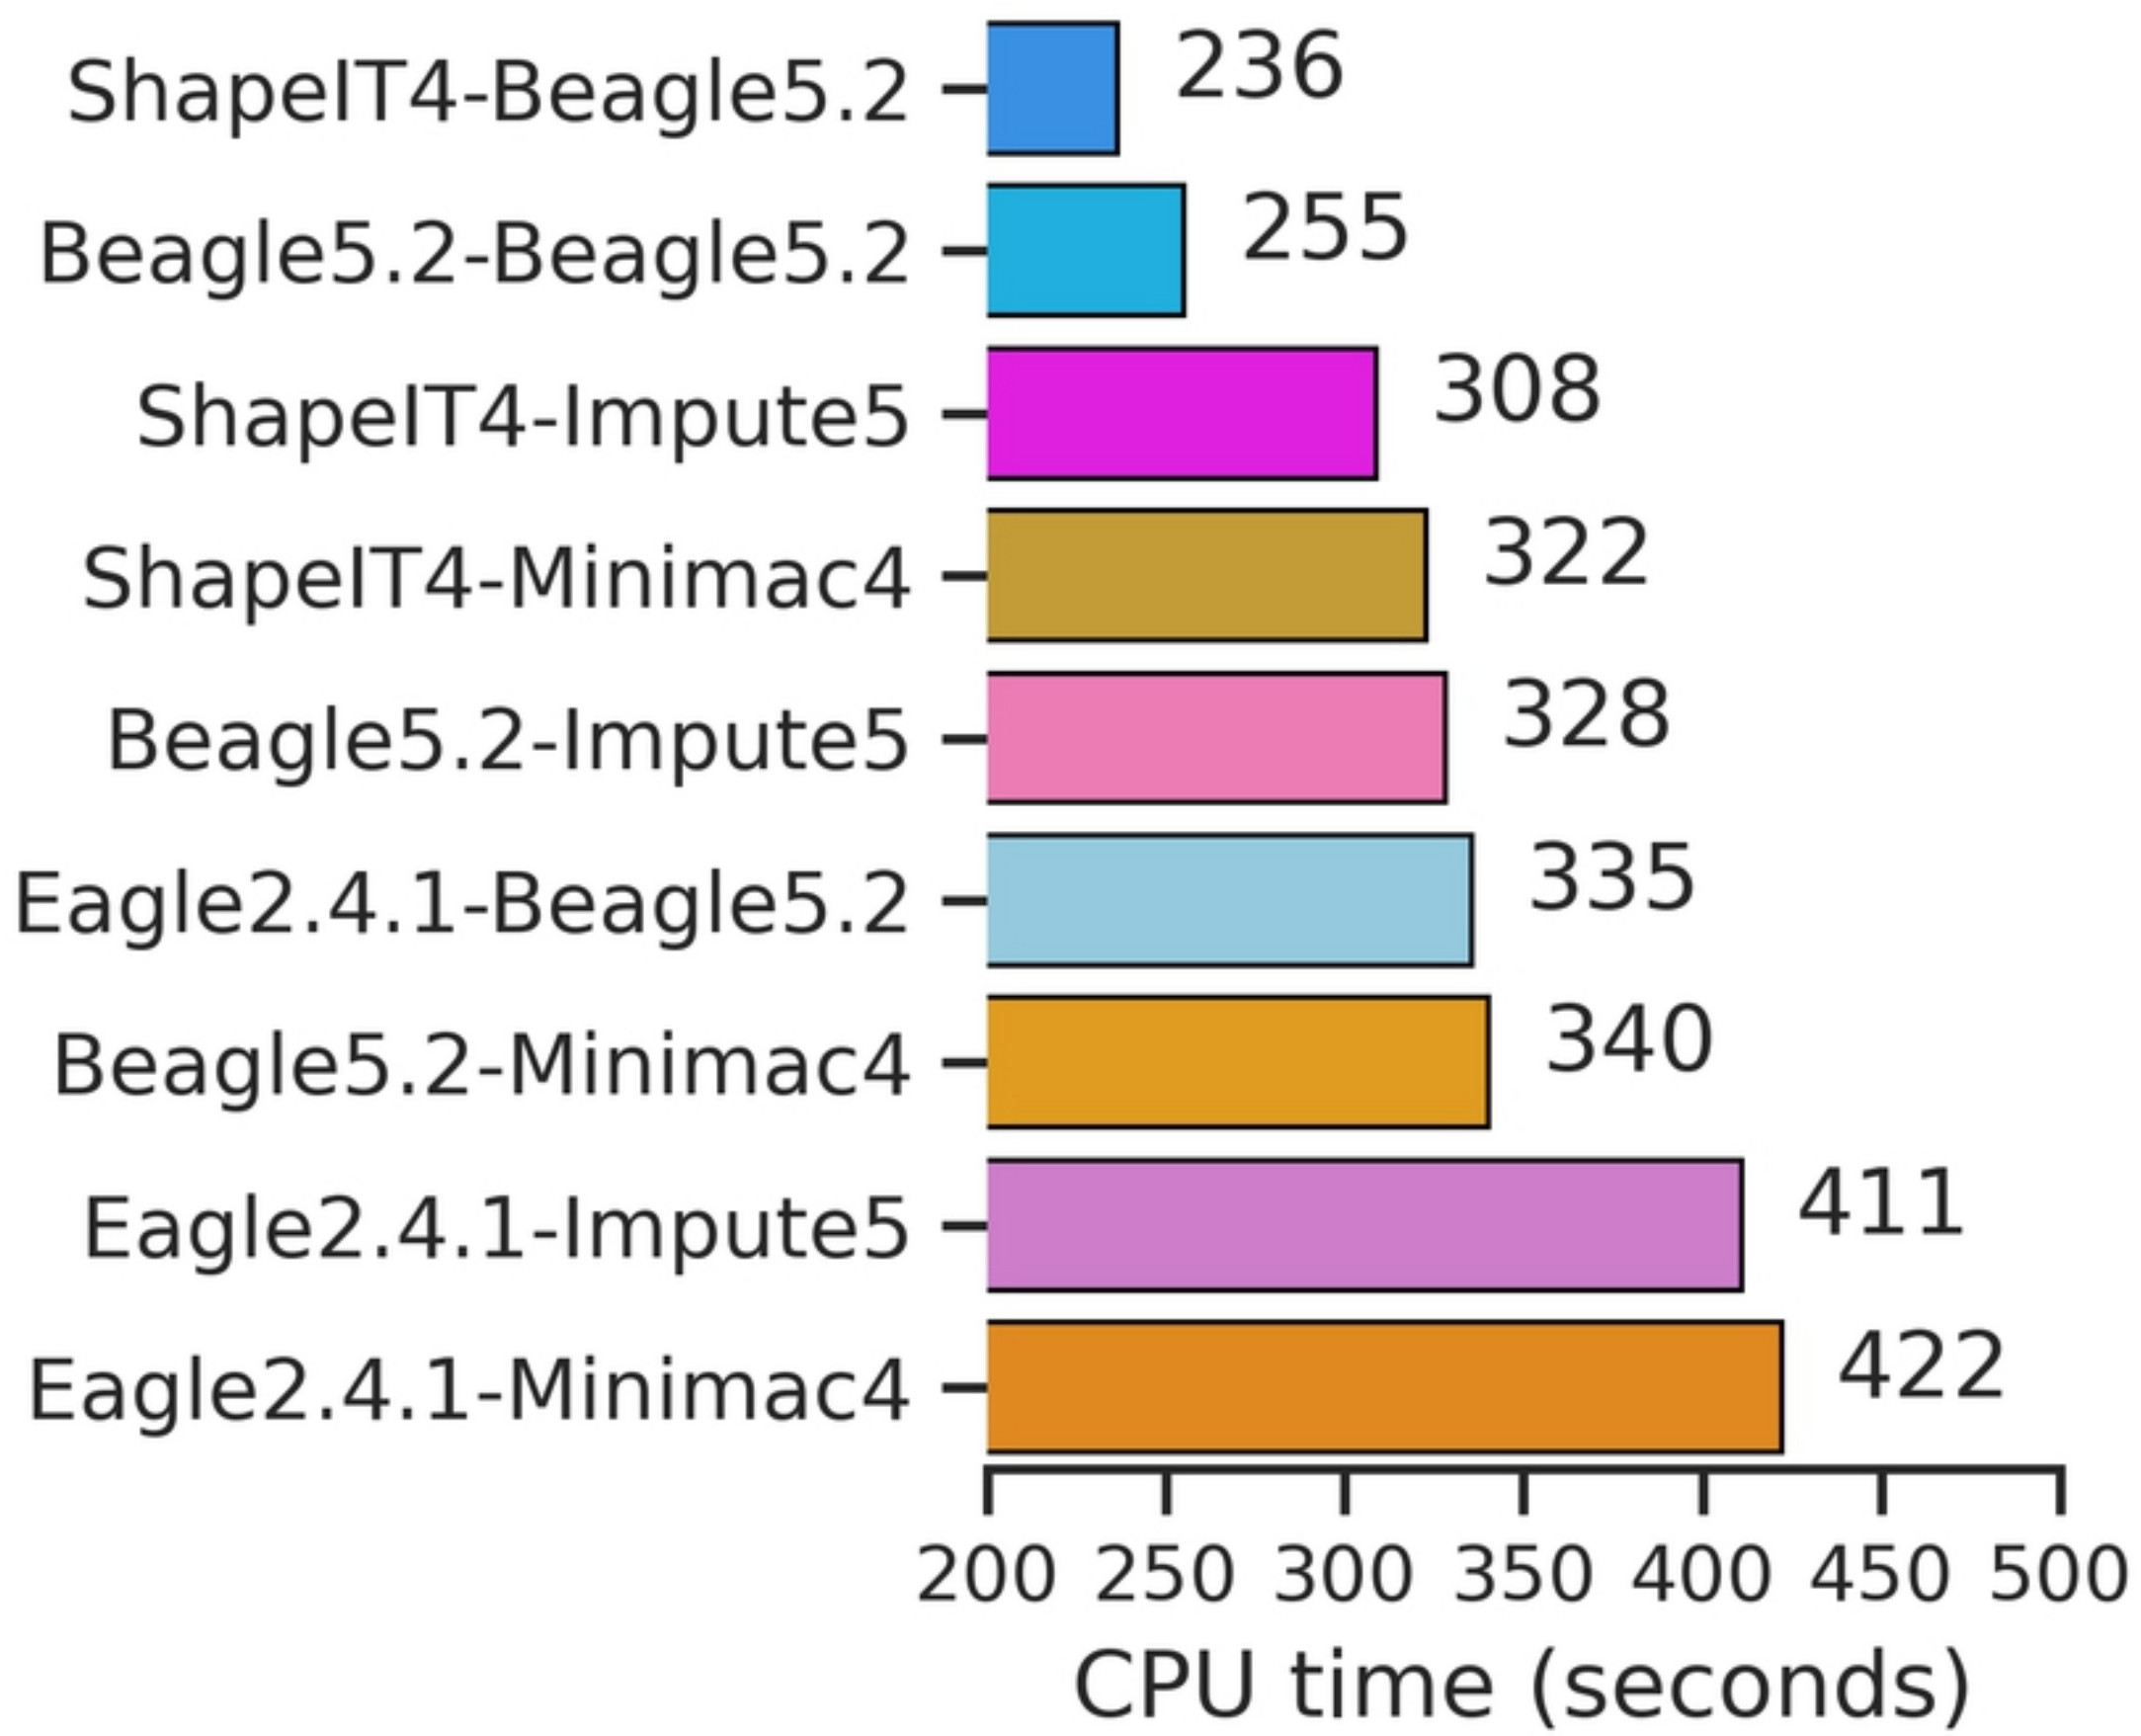

Figure 13
